1 **Contrasting patterns of genome-level diversity across distinct co-occurring bacterial**  
2 **populations**

3  
4 Sarahi L Garcia<sup>a,b,\*</sup>, Sarah L R Stevens<sup>a,\*</sup>, Benjamin Crary<sup>c</sup>, Manuel Martinez-Garcia<sup>d</sup>, Ramunas  
5 Stepanauskas<sup>e</sup>, Tanja Woyke<sup>f</sup>, Susannah G Tringe<sup>f</sup>, Siv G E Andersson<sup>g</sup>, Stefan Bertilsson<sup>b</sup>, Rex R.  
6 Malmstrom<sup>f</sup>, Katherine D McMahon<sup>a,c</sup>

7  
8 a Department of Bacteriology, University of Wisconsin-Madison Madison, WI, USA

9 b Department of Ecology and Genetics, Limnology and Science for Life Laboratory, Uppsala University, Uppsala,  
10 Sweden

11 c Department of Civil and Environmental Engineering, University of Wisconsin-Madison, Madison, WI, USA

12 d Department of Physiology, Genetics and Microbiology, University of Alicante, Alicante, Spain.

13 e Bigelow Laboratory for Ocean Sciences, East Boothbay, ME, USA

14 f DOE Joint Genome Institute, Walnut Creek, CA, USA

15 g Department of Molecular Evolution, Uppsala University Uppsala, Sweden

16 \* Equal contributors

17  
18  
19  
20 Corresponding Author:

21 Katherine D. McMahon

22 1550 Linden Drive

23 Madison, WI 53706

24 [Trina.mcmahon@wisc.edu](mailto:Trina.mcmahon@wisc.edu)

25  
26  
27  
28 The authors declare no conflict of interest.

29  
30  
31 The work conducted by the U.S. Department of Energy Joint Genome Institute, a DOE Office of  
32 Science User Facility, is supported by the Office of Science of the U.S. Department of Energy under  
33 Contract No. DE-AC02-05CH11231. KDM acknowledges funding from the United States National  
34 Science Foundation (NSF) Microbial Observatories program (MCB-0702395), the Long Term  
35 Ecological Research program (NTL-LTER DEB-1440297), an INSPIRE award (DEB-1344254), and  
36 the Swedish Wenner-Gren Foundation. RS acknowledges funding from NSF (DEB-0841933, EF-  
37 0633142 and OCE-821374). SB acknowledges funding from the Swedish Research Council. Sarahi  
38 Garcia thanks and acknowledges the JSMC for funding. MMG acknowledges funding from Ministry of  
39 Economy and Competitiveness (CGL2013-405064-R and SAF2013-49267-EXP)

43 **Abstract**

44 To understand the forces driving differentiation and diversification in wild bacterial  
45 populations, we must be able to delineate and track ecologically relevant units through space  
46 and time. Mapping metagenomic sequences to reference genomes derived from the same  
47 environment can reveal genetic heterogeneity within populations, and in some cases, be used  
48 to identify boundaries between genetically similar, but ecologically distinct, populations.  
49 Here we examine population-level heterogeneity within abundant and ubiquitous freshwater  
50 bacterial groups such as the acI Actinobacteria and LD12 Alphaproteobacteria (the freshwater  
51 sister clade to the marine SAR11) using 33 single cell genomes and a 5-year metagenomic  
52 time series. The single cell genomes grouped into 15 monophyletic clusters (termed “tribes”)  
53 that share at least 97.9% 16S rRNA identity. Distinct populations were identified within most  
54 tribes based on the patterns of metagenomic read recruitments to single-cell genomes  
55 representing these tribes. Genetically distinct populations within tribes of the acI  
56 actinobacterial lineage living in the same lake had different seasonal abundance patterns,  
57 suggesting these populations were also ecologically distinct. In contrast, sympatric LD12  
58 populations were less genetically differentiated. This suggests that within one lake, some  
59 freshwater lineages harbor genetically discrete (but still closely related) and ecologically  
60 distinct populations, while other lineages are composed of less differentiated populations  
61 with overlapping niches. Our results point at an interplay of evolutionary and ecological  
62 forces acting on these communities that can be observed in real time.

63

## 64 **Introduction**

65 Bacteria represent a significant biomass component in almost all ecosystems and  
66 drive most biogeochemical cycles on Earth. Yet we know little about the population structure  
67 of bacteria in natural ecosystems and have yet to find and define the boundaries for  
68 ecological populations. Cohesive temporal dynamics and associations inferred from  
69 distribution patterns have been documented for many habitats and these observations are  
70 consistent with the notion of such populations as locally coexisting members of a species  
71 (Shapiro and Polz 2014). The most compelling cases are from collections of closely related  
72 isolates (Hanage et al 2005, Luo et al 2011, Shapiro and Polz 2014), but cultured species  
73 represent only a very small portion of the bacteria populating the Earth (Amann et al 1995,  
74 Hug et al 2016, Kaeberlein et al 2002), and thus we still know little about the most abundant  
75 lineages. Therefore it is critical to study microorganisms in their natural environments (Little  
76 et al 2008), in order to test if and how their population-level heterogeneity differs from the  
77 established models based on isolates. The advent of culture-independent approaches, such as  
78 single-cell genomics and metagenomics, provides an opportunity for gaining new insights  
79 about genome-level diversity at the population level for organisms that are currently difficult  
80 or impossible to culture.

81 The delineation of ecologically differentiated lineages within complex microbial  
82 communities remains controversial because direct evidence for such differentiation is usually  
83 sparse (Hunt et al 2008). Additionally, the appropriate level of phylogenetic resolution  
84 defining ecologically equivalent groups has not yet been established and likely varies across  
85 different groups (Fuhrman et al 2015). Past explorations for defining such groups have used  
86 genome-wide average nucleotide identity (gANI) across shared regions of isolate genome  
87 sequences (Konstantinidis and Tiedje 2005, Varghese et al 2015). These studies have found  
88 that gANI greater than 94-96% unites past classical species definitions and separates known

89 sequenced strains into consistent and distinct groups. Genetically distinct populations have  
90 been identified in microbial communities using metagenomics by mapping reads against  
91 reference genomes and noting a coverage gap at 90-95% identity (Bendall et al 2016, Caro-  
92 Quintero and Konstantinidis 2012, Kashtan et al 2014, Konstantinidis and DeLong 2008, Oh  
93 et al 2011). Reads mapping with identities above the coverage discontinuity have been  
94 defined as originating from a ‘sequence discrete population’ (SDP) of genetically nearly  
95 identical cells that are distinct from other cells whose sequences map with identities below  
96 the coverage discontinuity (Bendall et al 2016). For the remainder of the manuscript, we will  
97 use the terms ‘population’ and ‘sequence-discrete population’ interchangeably.

98 We used a combination of time-series metagenomics and single cell genomics to  
99 define genetic diversification within ubiquitous and abundant freshwater lineages such as acI  
100 and tribe LD12. The term “tribe” was previously coined to delineate these groups using 16S  
101 rRNA gene sequences, where tribes are defined by monophyly and >97.9% within-clade 16S  
102 rRNA gene sequence identity (Newton et al 2007, Newton et al 2011). Freshwater microbial  
103 ecology researchers generally discuss and track these tribes as coherent units that are  
104 ecologically distinct from one another. A primary motivation for the present study was the  
105 challenge of moving beyond 16S rRNA sequence identity to delineate ecologically relevant  
106 taxonomic units given observed patterns of population-level heterogeneity, using shared  
107 genomic content. This study includes thirty-three Single Amplified Genomes (SAGs)  
108 representing fifteen phylogenetically coherent groups (i.e. freshwater “tribes”).

109 The SAGs in this study originated from four lakes geographically isolated from one  
110 another and represent a rich source of reference genomes that can be used to recruit  
111 metagenomic reads in order to study population-level heterogeneity and dynamics through  
112 time in naturally assembled communities. Two of the lineages featured in the present study  
113 are the abundant and ubiquitous freshwater Actinobacteria acI and Alphaproteobacteria alfV

114 containing the freshwater SAR11 sister-clade, tribe LD12. Members of these lineages are  
115 intriguing in their own right, as they represent groups of free-living ultramicrobacteria that  
116 dominate many freshwater ecosystems (Ghai et al 2014, Glöckner et al 2000, Heinrich et al  
117 2013, Rösler et al 2012, Salcher et al 2010, Salcher et al 2011, Warnecke et al 2005, Zwart et  
118 al 2002). They differ markedly with respect to within-lineage diversity: LD12 is the sole tribe  
119 defined within the freshwater alfV lineage, while the acI lineage is comprised of 13 tribes  
120 (Newton et al 2011). The acI and alfV are not easy to cultivate in monocultures (Kang et al  
121 2017) (though see (Henson et al unpublished data)) and share a large number of genomic and  
122 cellular traits. First, both lineages have genomes with GC content values lower than 40% and  
123 estimated sizes of about 1.5 Mb or less (Garcia et al 2013, Ghylis et al 2014, Kang et al 2017,  
124 Zaremba-Niedzwiedzka et al 2013). These genome characteristics are all the more striking  
125 since most cultivated species in the Alphaproteobacteria and Actinobacteria have GC-rich  
126 genomes up to 10 Mb in size. Second, both lineages have evolved by massive gene loss  
127 (Zaremba-Niedzwiedzka et al 2013). Third, the fraction of gained genes is only about 10% of  
128 the lost genes. Fourth, both groups of bacteria have small cell volumes (Heinrich et al 2013,  
129 Salcher et al 2011). However, acI and alfV seem to employ different substrate niche  
130 specialization. While acI is thought to primarily use polyamines, oligopeptides and  
131 carbohydrates, alfV specializes in carboxylic acids and lipids (Eiler et al 2016, Ghylis et al  
132 2014, Salcher et al 2013).

133 By combining genome information from twenty-one previously published (Ghylis et  
134 al 2014, Zaremba-Niedzwiedzka et al 2013) and twelve new SAGs from different freshwater  
135 lineages and an extensive five-year time series of lake metagenomes (94 samples), we  
136 investigated the population-level heterogeneity of such ubiquitous freshwater bacteria for the  
137 first time. Our results confirm the existence of coherent sequence-discrete populations within  
138 these ubiquitous freshwater bacterial groups in natural communities and we could trace the

139 abundance and gANI of these populations over monthly to seasonal time scales. Our work  
140 demonstrates the power of combining time-series metagenomics and single cell genomics for  
141 studying bacterial diversification and for describing ecologically meaningful population-level  
142 heterogeneity within communities inhabiting natural ecosystems.

143

## 144 **Results**

145 *The SAG collection represents multiple clades within cosmopolitan freshwater lineages*

146 We analyzed 33 SAGs from four different freshwater lakes. Twenty-one of these  
147 SAGs were previously analyzed for their genomic features and phylogenetic relationships  
148 (Eiler et al 2016, Garcia et al 2013, Ghylin et al 2014, Zaremba-Niedzwiedzka et al 2013).  
149 The 33 SAGs had total assembly sizes between 0.33 and 2.42 Mbp and were organized into 8  
150 to 103 contigs with GC contents between 29.1% and 51.7% (**Table 1**). Estimated genome  
151 completeness, calculated using two different methods, ranged between 30% and 99%.  
152 Throughout the paper we will use mostly the shorter name version to facilitate reading, for  
153 example, M14 in place of AAA027-M14.

154 The 33 SAGs in the study represent fifteen different previously defined freshwater  
155 “tribes” (that are each monophyletic and defined by >97.9% within-clade 16S rRNA gene  
156 sequence identity, measured across the nearly full-length 16S rRNA gene) (Newton et al  
157 2007, Newton et al 2011). Ten tribes are represented by only one SAG each, while four tribes  
158 (LD12, acI-A1, acI-A7 and acI-B1) have more than one SAG representative in our dataset. In  
159 addition to their classification based on 16S rRNA genes, the nine SAGs that were the only  
160 representatives of their lineage were classified using protein coding marker genes and  
161 PhyloSift (Darling et al 2014) (**Table S1**). To illustrate phylogenetic and taxonomic  
162 placement of the LD12 and acI SAGs, we used the PhyloPhlAn pipeline (Segata et al 2013)  
163 to generate a multi-gene tree (**Figure 1A and 1B**). The tree topology was consistent with

164 previous phylogentic reconstructions for LD12 (Zaremba-Niedzwiedzka et al 2013) and acI  
165 (Ghylin et al 2014, Newton et al 2007). The tree supported the 16S rRNA gene-based tribe  
166 designations but did not reveal a clear biogeographic pattern, in agreement with previous  
167 analyses, i.e. members of the same tribes were found in different lakes (Zaremba-  
168 Niedzwiedzka et al 2013). However, our SAG collection was not designed to explore  
169 biogeography and much deeper sampling of each population would be needed to address this  
170 question rigorously.

171

### 172 *Genome-wide nucleotide identity is consistent with phylogeny*

173 Although multi-locus phylogenies supported the 16S rRNA gene based phylogeny, we  
174 wondered whether gANI could similarly be used to demarcate one tribe from another. To this  
175 end, we determined the pairwise gANI for genomes in the set of four tribes that each  
176 contained more than one SAG representative. This general approach has been proposed as a  
177 way to compare genome pairs using a single metric that robustly reflects phylogenetic and  
178 taxonomic groupings obtained using other polyphasic methods (Konstantinidis and Tiedje  
179 2005, Varghese et al 2015). We asked whether all genome pairs from the same tribe shared a  
180 consistent minimum gANI. Most SAGs shared gANI of at least 78% and alignment fractions  
181 greater than 40% with other members of the same tribe (**Figure 1C and Table S2**). Most  
182 pairs from the same tribe that were also recovered from the same lake shared at least 84%  
183 gANI, but some pairs were much more similar (gANI above 95%). gANIs between pairs  
184 belonging to different tribes but still within the same lineage were markedly lower and  
185 typically below 74% (e.g. acI-A1 vs acI-B1) (**Figure 1C and Table S2**).

186 Although gANI is a useful univariate metric for comparing genome pairs, it masks the  
187 differences in sequence similarity of individual genes or genome regions that arise due to  
188 varying rates of divergence across loci. This variation can be visualized by plotting the

189 frequency distribution of nucleotide identities calculated using a sliding window across the  
190 genome (Konstantinidis and Tiedje 2005). We asked whether different homologous genomic  
191 regions from two SAGs would have markedly different nucleotide identities even if they  
192 were from the same tribe. We used the most complete SAGs from the acI-B1 and LD12 tribes  
193 as reference genomes and calculated nucleotide identity using a sliding window with other  
194 SAGs from the same respective tribe and visualized the results as a frequency distribution  
195 (**Figure 2 and Figure S1**). The acI-B1 SAGs featuring the highest gANI (L06 and A23) were  
196 both from Lake Mendota and shared nucleotide identity consistently greater than 95% with a  
197 peak at 99-100%, suggesting they belong to the same SDP. The acI-B1 SAG P03 recovered  
198 from a lake in Germany had a frequency distribution with a peak more near 97% and a  
199 distinctly different shape. Other acI-B1 SAGs shared genomic regions with primarily 80-85%  
200 nucleotide identity. This was even true for J17, which was also collected from Lake Mendota  
201 and shared an average gANI of 79% with L06/A23 (**Table S2**), suggesting that cells  
202 belonging to the same tribe (acI-B1) and living in the same environment can have substantial  
203 genetic differences. The LD12 SAGs, which all belonged to the same tribe, also displayed  
204 three distinct patterns, with one peak near 85%, several near 91%, and two near 97%. Lake  
205 origin did not appear to explain these differences. That is, some LD12 cells from Lake  
206 Mendota were more similar to LD12 cells from Sparkling Lake than to other LD12 cells from  
207 Lake Mendota.

208

### 209 *Diversity of wild populations inferred using SAGs*

210 The variety of patterns observed in **Figure 2** indicated substantial within-tribe  
211 variability even among cells recovered from the same lake. This made us wonder if tribes  
212 were composed of genetically and ecologically distinct populations coexisting in the same  
213 environment. SAGs can serve as relevant reference points to study the diversity of abundant



214 populations sampled using shotgun metagenomics by recruiting metagenomic reads and  
215 examining the extent of nucleotide identity for each aligned read (Stepanaukas 2012). The  
216 results can also be used to identify sequence-discrete populations whose boundaries are  
217 revealed by recruitment patterns and specifically the dramatic drop in coverage observed  
218 around 95% sequence identity (Bendall et al 2016, Caro-Quintero and Konstantinidis 2012,  
219 Konstantinidis and DeLong 2008). We asked whether such SDPs could be identified using  
220 metagenomic reads from Lake Mendota, WI, USA, by mapping them to the 33 SAGs, 19 of  
221 which were collected from this lake.

222 Each of the SAGs was first used to recruit reads from a single metagenomic dataset  
223 collected from Lake Mendota on 29 April 2009 (**Figure S2**). This time point was chosen  
224 because it was the sample collected closest to the date on which the single cells were  
225 collected (12 May 2009). Frequency distribution plots of the same data (**Figure 3 and Figure**  
226 **S3**) revealed patterns that were similar to those obtained with SAG pairs (**Figure 2**). The five  
227 acI-SAGs from Lake Mendota (J17, L06, A23, M14 and I14) recruited more reads than the  
228 acI-SAGs from other lakes, with many reads recruiting at nucleotide identity greater than  
229 97.5% (**Figure 3A**). All of the acI-SAGs also recruited many reads at 60 – 90% identity  
230 (**Figure 3A and D**), creating the characteristic bimodal distribution observed in previous  
231 work (Caro-Quintero and Konstantinidis 2012). Based on these results, we hereafter consider  
232 reads sharing  $> 97.5\%$  nucleotide identity as coming from the same, operationally defined  
233 *population* (i.e. SDP) as the reference SAG. Thus, the acI lineage in Lake Mendota on 29  
234 April 2009 was composed of multiple SDPs. Interestingly, the acI-B1 tribe in Lake Mendota,  
235 a subset of the acI lineage, appeared to be composed of at least two coexisting and genetically  
236 distinct populations, one represented by SAG J17 and the other by SAGs A23 and L06,  
237 consistent with the pairwise gANI observed using only the SAGs (**Figure 2**).

238 To determine if we recovered representative SAGs from all acI populations in Lake

239 Mendota, we next performed recruitments competitively, allowing each read to only map to  
240 the SAG with the greatest percent identity (**Figure S4**). Since the patterns in **Figure 3** were  
241 generated by non-competitive recruiting, some reads mapping with 100% identity to one  
242 SAG might for example also have mapped with 60-90% identity to SAGs from different  
243 SDPs. Under competitive recruiting conditions the resulting frequency distributions changed  
244 and the fraction of reads recruiting with 60-90% identity to each acI SAG dropped  
245 dramatically (**Figure S4**). However, a secondary peak around 80% identity still remained in  
246 most cases, and it is possible these reads originated from cells belonging to other acI  
247 populations lacking a representative SAG.

248 LD12 SAGs collected from Lake Mendota (C06, J10, L15, C07 and D10) also had a  
249 distinctive peak of recruited reads at >97.5% sequence identity (**Figure 3B**), although the  
250 overall shape of the recruitment patterns differed dramatically from those of the acI lineage.  
251 For example, LD12 SAGs had a secondary recruitment peak at ~92% identity whereas the acI  
252 SAGs had secondary peaks at ~75% with non-competitive recruiting (**Figure S4**). This  
253 suggests the SDPs within the LD12 tribe were more similar genetically than populations  
254 comprising the acI-B1 tribe. In fact, the populations were sufficiently similar that the  
255 hallmark coverage discontinuity below 97% similarity was not particularly pronounced  
256 (**Figure 3B**). Under competitive recruiting conditions, the LD12 recruitment distribution  
257 plots had remarkably different shapes (**Figure S4B and D**), as compared to the uncompetitive  
258 recruiting conditions (**Figure 3B**), and each SAG had only a single peak at >97.5% identity.  
259 This suggests the majority of LD12 cells in Lake Mendota belong to SDPs represented by the  
260 SAGs in our collection.

261 All but one (I06) of the other freshwater SAGs in this study that were collected from  
262 Lake Mendota generated the distinctive read recruitment frequency peak above 97.5%  
263 identity (**Figure 3C**) that was observed for acI (**Figure 3A**). A negligible number of reads

264 recruited to the SAGs collected from other lakes under the competitive recruiting conditions  
265 (data not shown).

266 Four complete acI genomes recovered from Lake Soyang in Korea were recently  
267 published, and we included these in our recruitment analysis (**Figure 3F**). Three of the SAGs  
268 exhibited recruitment frequency distributions analogous to those obtained using acI SAGs  
269 from Sparkling Lake and Damariscotta Lake (**Figure 3D**), with very few reads mapping  
270 above 90% ANI. The distribution from one SAG (IMCC19121) was remarkably similar to  
271 that obtained from SAG N04, which was recovered from Damariscotta Lake in Maine. Both  
272 IMCC19121 and N04 are members of the acI-A7 tribe and share 89.8% ANI with each other.

273

274 *Are sequence-discrete populations within a tribe ecologically discrete too?*

275 Results from a single metagenome sample suggested that individual tribes were  
276 composed of multiple genetically distinct populations that could be delineated and tracked  
277 using metagenomic read recruitment. Next we hypothesized that these populations might also  
278 be ecologically distinct and fill different realized niches. If so, we might expect these  
279 populations to display different temporal abundance patterns. We followed changes in  
280 population abundance through time by recruiting reads from a five-year metagenomic time-  
281 series applying a nucleotide identity cutoff of 97.5%, using only those SAGs derived from  
282 Lake Mendota. SAGs from the LD12 tribe recruited more reads than all of the acI SAGs  
283 summed together, on almost all sample dates (**Figure S5**).

284 Using the relative number of reads recruited as a proxy for abundance, we found the  
285 J17 population, which belonged to the acI-B1 tribe, to be the most abundant acI population in  
286 almost every sample (**Figure 4A and 5A**). The abundance of the J17 population was poorly  
287 correlated over time with the other acI-B1 population represented by L06 (maximum  
288 Spearman rank correlation = 0.256), indicating each population had a different temporal

289 abundance pattern.

290 In contrast to the acI-B1 tribe, the populations comprising the LD12 tribe had highly  
291 similar abundance patterns. (**Figure 4B and S6**). The abundances of J10, L15, and C06  
292 populations were strongly correlated (Spearman rank correlation = 0.996-0.999) (**Figure S8**  
293 **and Table S5**) and tended to peak both in Spring and Fall (**Figure S6**). The D10 population  
294 was the most abundant in the dataset but its abundance was not as strongly correlated to the  
295 other LD12 populations (Spearman rank correlation = 0.705-0.725) (**Figure S8 and Table**  
296 **S5**). The C07 population was the least abundant but was also correlated to both the J10-L15-  
297 C06 populations and the D10 population (Spearman rank correlation = 0.850-0.873).

298

299 *Does the genetic diversity of populations change over time?*

300 We also examined the extent to which within-population diversity varied through time  
301 by quantifying changes in population-wide ANI, i.e. the average identity of all reads mapping  
302 with at least 97.5% identity (**Figure 5B**). For this purpose, we only recruited reads to SAGs  
303 recovered from Lake Mendota. More abundant populations (such as LD12 and acI-B1 J17)  
304 generally had lower population-wide ANI variance through time compared to some less  
305 abundant populations (such as acSTL-A1-D23 and acI-A6-I14). For example, the SAG bacI-  
306 A1 G08 population had relatively high population-wide ANI in June 2009, around the time  
307 when the sample was collected for SAG library collection, but had markedly lower ANI on  
308 all other dates. One interesting exception to this observation was a significantly lower ANI  
309 for the relatively abundant acI-B1 L06-A23 population in 2012, as compared to 2007-2011  
310 (Mann-Whitney U test  $p=1.4e-06$ ).

311

## 312 **Discussion**

313 Comparative genomics can reveal the diversity and structure of bacterial populations.

314 This approach is particularly powerful when applied using single cells recovered from  
315 environmental samples (SAGs) and shotgun metagenomes from the same or similar  
316 ecosystems. Here we used a combination of 33 SAGs and 94 metagenomes collected over  
317 five years to ask the following questions: 1) How well do individual SAGs represent the  
318 population-level diversity found in natural communities? 2) Do common freshwater bacterial  
319 groups have similar patterns of population-level diversity? and 3) How stable is population  
320 abundance and diversity through time? We used the answers to these questions to gain insight  
321 into the population-level diversity and ecology of the cosmopolitan and abundant freshwater  
322 bacteria, alfV-LD12 (Alphaproteobacteria) and acI (Actinobacteria).

323         Sequence-discrete populations could be delineated in the Lake Mendota metagenome  
324 using our 33 SAGs as references, as has previously been demonstrated in other lakes using  
325 genomes assembled from metagenomes (Bendall et al 2016, Caro-Quintero and  
326 Konstantinidis 2012). We interpret the occurrence of these populations in the context of  
327 previously defined phylogenetically coherent and ostensibly ecologically distinct “tribes”  
328 composed of cells with >97.9% 16S rRNA identity (Newton et al 2011). We conclude that the  
329 freshwater tribes can contain multiple sequence-discrete populations. The converse is, of  
330 course, not true: sequence-discrete populations can never represent multiple tribes because  
331 tribes are by definition more distantly related to one another than genomes sharing a  
332 minimum of 97.5% gANI.

333         Pair-wise gANI analysis of SAGs and metagenomic read recruitment indicated that  
334 cells belonging to the same tribe but inhabiting different lakes were usually genetically  
335 distinct. For example, SAGs collected from other lakes generally recruited very few reads  
336 from Lake Mendota at ANI >97.5% while many recruited a substantial number of reads in the  
337 89-92% range (**Figure 3**). However there were two prominent exceptions: LD12 N17 and  
338 L09, both of which are from Sparkling Lake. N17 and L09 share 97% gANI with Mendota

339 SAG D10, which is substantially higher than the average (88%) and median (90%) within-  
340 tribe gANI (**Table S2**). These SAGs also recruited roughly the same number of reads with  
341 >97.5% identity as did the LD12 SAGs from Lake Mendota, though around 17% (L09) and  
342 23% (N17) of the base pairs in the genomes did not recruit any reads. This implies that some  
343 gene content was present in the Sparkling Lake populations but missing in Lake Mendota.  
344 However, 10% of the base pairs in the D10 genome also did not recruit any reads, even  
345 though it was from Lake Mendota. We examined the phylogenetic distribution of low-  
346 coverage contigs and did not discern any evidence of contamination. This rare genome  
347 content could represent flexible or low frequency genes in the population, or contamination  
348 in the SAG preparation (Blainey 2013). However, it could also represent systematic coverage  
349 bias, a phenomenon that we are not able to rule out with the data at hand.

350         In Lake Mendota, acI cells are organized into genetically discrete populations, but the  
351 forces creating this organization remain unknown. The consistent lack of coverage around  
352 90-97% identity in recruitment plots indicates Lake Mendota lacks acI genotypes sharing this  
353 degree of sequence similarity with our SAGs, or at least that these putative genotypes were  
354 consistently at much lower abundances than their close relatives over the five years surveyed.  
355 The P03 SAG from Stechlin Lake shares gANI of 96% with acI-B1 SAGs from Mendota,  
356 indicating that genotypes within this locally excluded sequence space do exist, at least as long  
357 as they are from different environments. We infer the persistence of the coverage  
358 discontinuity between populations to be less a factor of dispersal limitation and more likely  
359 the result of competitive exclusion and barriers to recombination within Mendota  
360 populations. Additional SAG and metagenomic studies are necessary to determine if similar  
361 coverage discontinuities are observed in other phylogenetic groups and in different  
362 environments. However, we do note that others have observed similar population-level  
363 diversity in other lakes (Bendall et al 2016, Caro-Quintero and Konstantinidis 2012) and

364 marine ecosystems (Konstantinidis and DeLong 2008).

365 We know that both acI tribes and LD12 vary in abundance over seasonal and annual  
366 time-scales, based on previous work using 16S rRNA gene sequencing, quantitative PCR, and  
367 FISH (Allgaier and Grossart 2006, Eiler et al 2012, Heinrich et al 2013, Salcher et al 2011).  
368 Here we used our SAGs to track such populations at monthly intervals over five years  
369 (**Figure 4 and Figure S5**). The results confirmed prior work that showed acI tribes and LD12  
370 are among the most abundant non-cyanobacterial groups in Lake Mendota (Newton et al  
371 2011) but also revealed dynamics at unprecedentedly high phylogenetic resolution. Based on  
372 our extensive comparison of how SAGs recruited relative to one another, we are confident  
373 that our metagenomic recruitment filters allowed us to delineate discrete populations that  
374 would not be possible to resolve using more traditional and widely used methods (e.g. 16S  
375 rRNA gene sequencing or FISH). However, we do note that our acI SAG collection to date  
376 does not seem to fully capture the full diversity of acI populations in the lake, as evidenced  
377 by the residual peak of reads matching our SAGs at ~70-80% ANI, even under competitive  
378 recruiting conditions. For example, we roughly estimate that our acI SAGs captured only  
379 12% of the resident acI metagenome on 29 April 2009, as compared to 50% of the LD12  
380 metagenome (**Table S3**). Thus, we cannot completely rule out the possibility that we missed  
381 strong correlations among other acI populations that we could not detect.

382 However, the most striking finding of our study was that metagenomic recruitments to  
383 LD12 SAGs yielded dramatically different patterns compared to the acI lineage. We  
384 discovered that LD12 populations were not as strongly genetically separated as acI  
385 populations; pair-wise gANIs between SAGs were higher and recruitment plots showed  
386 secondary peaks between 90-95% identity (**Figure 3B**), the same range where coverage of  
387 acI SAGs was at a minimum (**Figure 3A**). Under a competitive recruitment analysis, wherein  
388 each read is counted only once and attributed to the best match SAG, the secondary peaks



389 disappear (**Figure S4**), indicating the LD12 SAGs represent highly similar, but still  
390 genetically discrete, populations. Temporal abundance patterns of these LD12 populations  
391 were strongly correlated over five years, whereas acI populations showed much lower  
392 correlation within tribes (**Figure S8**). This suggests that the acI-B1 populations are  
393 ecologically distinct (i.e. occupying temporally discrete niches) while LD12 populations are  
394 less differentiated with respect to niche dimensions, leading to co-occurrence and  
395 synchronization of temporal abundance patterns. LD12 is a particularly fascinating group  
396 because it is also a subclade of the broader SAR11 clade, with hypothesized ancient transition  
397 from marine to freshwater (Logares et al 2010) followed by specialization through gene flux  
398 and mutation, with comparatively low recombination rates (Zaremba-Niedzwiedzka et al  
399 2013). Over time, low recombination rates and relatively low selection levels should lead to  
400 large genetic divergence among coexisting populations. Thus, we propose that LD12  
401 populations are simply at earlier stages of differentiation as compared to acI populations,  
402 although we cannot exclude that something fundamental about their lifestyle is “holding” the  
403 populations together genetically and ecologically. This is particularly interesting in light of  
404 recent reports of unusually high recombination rates in LD12 (Zaremba-Niedzwiedzka et al  
405 2013), pointing to the need to further investigate contrasting population structures and what  
406 these structures mean for the ecophysiology of the organisms. We do note that it is also  
407 possible that the highly correlated LD12 populations are each occupying unidentified distinct  
408 niches that are unrelated to the temporal correlation, allowing these slightly genetically  
409 differentiated populations to co-occur while being ecologically distinct. In any case, the lack  
410 of coherence among acI-B1 populations challenges our concept of tribes as ecologically  
411 coherent units and suggestions that freshwater microbial ecologists re-examine conventions  
412 for tracking these units through space and time. Taken together, these observations suggest  
413 fundamental differences in evolutionary history and/or lifestyles among these abundant and



414 ubiquitous freshwater bacteria.

415         The metagenomic recruitments allowed us to also examine the extent to which  
416 diversity varied within and among populations as well as how diversity changed over time.  
417 We calculated the population-wide ANI for reads that recruited only above 97.5% and found  
418 the resulting value was remarkably stable through time for most of the abundant populations  
419 (**Figure 5B**). This was particularly true for the LD12 populations. However, one striking  
420 contrast was the acI-B1 population represented by L06/A23, which had consistent  
421 population-wide ANI of 99.3% during 2008-2011 but 99.0% during 2012 (Mann-Whitney U  
422 test  $p=1.4e-06$ ). Similar shifts were observed previously in sequence-discrete populations  
423 inhabiting Trout Bog Lake, indicating this could be a common phenomenon among  
424 freshwater clades (Bendall et al 2016). Unlike the genome-wide selective sweep observed in  
425 one *Chlorobium* population from Trout Bog Lake, the distribution of single nucleotide  
426 polymorphisms within the L06/A23 population before and after 2012 exhibited no clear  
427 pattern of gene- or genome-wide sweep (data not shown). That is, it seems that the increase in  
428 population-wide gANI resulted in a change in the relative abundance of individual genotypes,  
429 rather than a single new genotype overtaking the population. It is difficult or impossible to  
430 separate genotypes within sequence-discrete populations using short-read shotgun  
431 sequencing, so further work using long-read technologies will be needed to link SNPs in  
432 populations to individual genomes. This kind of approach will likely be required to tease  
433 apart the paths leading to diversification within and among populations.

434

## 435 **Methods**

### 436 *Single amplified genomes (SAGs)*

437         Water samples (1-ml) were collected from the upper 0.5m to 1m of each of four lakes  
438 (Mendota, Sparkling, Damariscotta, Stechlin) and cryopreserved, as previously described

439 (Garcia et al 2013, Martinez-Garcia et al 2011). These lakes were originally selected because  
440 they represent different freshwater trophic status (eutrophic, oligotrophic, mesoeutrophic, and  
441 oligotrophic, respectively) and geographic regions (Wisconsin and Maine, USA, and  
442 Germany). Bacterial single amplified genomes (SAGs) were generated by fluorescence-  
443 activated cell sorting (FACS) and multiple displacement amplification (MDA), and identified  
444 by PCR-sequencing of their 16S rRNA genes at the Bigelow Laboratory Single Cell  
445 Genomics Center (SCGC; <http://scgc.bigelow.org>). Thirty-two SAGs from lakes Mendota,  
446 Sparkling and Damariscotta were selected for sequencing based on the previously sequenced  
447 16S rRNA gene as well as the kinetics of the MDA reactions (Martinez-Garcia et al 2011).  
448 The one SAG from Lake Stechlin was selected from a separate library because its 16S rRNA  
449 gene was 100% identical to an acI-B1 SAG previously analyzed (AAA027-L06) (Garcia et al  
450 2013). In the present study we analyze 21 previously published and 12 new SAGs. All 33  
451 SAGs were analyzed (**Table 1**) after genome sequencing, assembly, contamination removal  
452 and annotation as previously described (Ghylin et al 2014). Estimation of completeness was  
453 done using CheckM (Parks et al 2015) and the gene markers from a recent study examining a  
454 large collection of draft environmental genomes (Rinke et al 2013).

455

456 *Tree construction, Average Amino acid and Average Nucleotide Identity (AAI, ANI)*

457 A phylogenomic analysis was conducted using PhyloPhlAn (Segata et al 2013). ANI  
458 was calculated by using the method described in (Konstantinidis and Tiedje 2005) with  
459 fragment size of 1000, minimum alignment length of 700 bp, percent identity of 70, and e-  
460 value of 0.001. AAI was calculated by averaging the identity of the reciprocal best hits from  
461 the BLASTP searches of the predicted proteins for each pair of genomes. 16S rRNA gene  
462 similarity for each pair was calculated using the overlapping region in an alignment created  
463 using a multiple alignment (default options) in Geneious Version R6 (Kearse et al 2012).

464 Additional classifications were carried out using PhyloSift version 1.0.1, which examines 37  
465 conserved single copy marker genes and places them into a phylogenetic reference tree  
466 (Darling et al 2014).

467

#### 468 *SAG-to-SAG recruitments*

469 SAG pairs from the same tribe were used to examine the frequency distribution of  
470 nucleotide identities across homologous regions of the two genomes. In order to create a  
471 sliding window for comparison, the contigs of all SAGs were shredded into 301bp fragments  
472 with 150 bp overlap. Two SAGs were selected as reference genomes: L06 as the most  
473 complete from the tribe acI-B1 and C06 as the most complete LD12. The contigs of each of  
474 the two selected SAGs were used as a reference for recruiting from the shredded SAGs using  
475 Blast 2.2.28 (Camacho et al 2009). Ribosomal RNAs were masked from the SAGs prior to  
476 performing blast.

477

#### 478 *Five-year time series metagenome data: sampling, sequencing and recruitments*

479 Samples were collected from Lake Mendota over the course of five years, as  
480 previously described (Kara et al 2013, Shade et al 2007). Lake Mendota, Madison,  
481 Wisconsin, (N 43°06, W 89°24) is one of the most well-studied lakes in the world, and is a  
482 Long Term Ecological Research site affiliated with the Center for Limnology at the  
483 University of Wisconsin Madison (Carpenter et al 2006). It is dimictic and eutrophic with an  
484 average depth of 12.8 m, maximum depth of 25.3 m, and total surface area of 3938 ha. Depth  
485 integrated water samples were collected from 0 to 12 m of the epilimnion (upper mixed layer)  
486 at 94 different time points during ice-free periods from summer 2008 to summer 2012, and  
487 filtered onto 0.2 µm pore-size polyethersulfone filters (Supor, Pall) prior to storage at -80°C.  
488 DNA was later purified from these filters using the FastDNA kit (MP Biomedicals). DNA  
489 sequencing was performed at the Department of Energy Joint Genome Institute using

490 standard protocols (Walnut Creek, CA, USA). DNA from the 94 samples was used to  
491 generate libraries that were sequenced on the Illumina HiSeq 2000 platform. Paired-end  
492 sequences of 2 X 150bp were generated for all libraries. Adapter sequences, low quality reads  
493 (i.e.  $\geq 80\%$  of bases had quality scores  $< 20$ ), and reads dominated by short repeats of  $\geq 3$  bp  
494 were removed. The remaining high quality reads were merged with the Fast Length  
495 Adjustment of Short Reads (Magoc and Salzberg 2011) with a mismatch value of  $\leq 0.25$  and a  
496 minimum of ten overlapping bases from paired sequences, resulting in merged read lengths of  
497 150 to 290 bp (**Table S4**). Metagenomes were pooled by month to reduce the time-series data  
498 to 30 observations and increase coverage. Original records can be found as a group in JGI's  
499 Genome Portal: [http://genome.jgi.doe.gov/Mendota\\_metaG](http://genome.jgi.doe.gov/Mendota_metaG).

500  
501 All contigs from each of the 33 SAGs were used as a reference to recruit reads from  
502 the Mendota metagenomes using blastn. Metagenome reads that recruited to the SAGs were  
503 filtered and only alignments 200bp or longer were considered. An additional filter requiring  
504 an alignment percent identity of at least 97.5% was applied when analyzing the metagenome  
505 time series. Ribosomal RNAs were masked from the SAGs prior to performing the  
506 recruitments. Relative abundance was calculated by normalizing the number of basepairs that  
507 recruited to each SAG by the genome and pooled metagenome size and multiplying all by the  
508 average pooled metagenome size. When appropriate to the research question, recruitment was  
509 conducted “competitively”, meaning that if a read recruited to more than one SAG it was  
510 only counted for the best hit SAG. In this case, if a read recruited equally well to both SAGs,  
511 it was counted for both. In some cases we applied an even stricter definition of “competitive”  
512 and did not count any read that recruited equally well to more than one SAG. For **Figure 3**,  
513 recruitment was conducted “non-competitively”, meaning that reads could be counted for  
514 multiple SAGs as long as the hits met the filtering criteria. We note that this a commonly  
515 used approach developed by other researchers (Konstantinidis and Tiedje 2005,

516 Konstantinidis and DeLong 2008). The figure and table legends contain the information  
517 necessary to discern which kind of recruitment criteria were applied for that specific analysis.

518

519 *Statistics, Visualization, Reproducible Methods*

520 Datasets were analyzed and results were visualized using custom scripts written in R  
521 (R Core Team 2014) and python. Pipeline and scripts for analysis can be found at  
522 <https://github.com/McMahonLab/blast2ani>.

523

524 Supplementary information is available at the ISME Journal's website.

525

526

527 **Conflict of interest Statement:** The authors declare no conflict of interest.

528

529

530

## 531 **References**

532

533 Allgaier M, Grossart H-P (2006). Diversity and Seasonal Dynamics of Actinobacteria  
534 Populations in Four Lakes in Northeastern Germany. *Appl Environ Microbiol* 72: 3489-3497.

535

536 Amann RI, Ludwig W, Schleifer KH (1995). Phylogenetic identification and in situ detection  
537 of individual microbial cells without cultivation. *Microbiological Reviews* 59: 143-169.

538

539 Bendall M, Stevens S, Chan L-K, Malfatti S, Tremblay JE, Schwientek P *et al* (2016).  
540 Genome-wide selective sweeps and gene-specific sweeps in natural bacterial populations.  
541 *ISMEJ* 10: 1589-1601.

542

543 Blainey PC (2013). The future is now: single-cell genomics of bacteria and archaea. *FEMS*  
544 *Microbiol Rev* 37: 407-427.

545

546 Camacho C, Coulouris G, Avagyan V, Ma N, Papadopoulos J, Bealer K *et al* (2009).  
547 BLAST+: architecture and applications. *BMC Bioinformatics* 10: 421.

548

549 Caro-Quintero A, Konstantinidis KT (2012). Bacterial species may exist, metagenomics  
550 reveal. *Environmental microbiology* 14: 347-355.

551

- 552 Carpenter SR, Lathrop RC, Nowak P, Armstrong DE, Bennett EM, Reed-Andersen T *et al*  
553 (2006). The ongoing experiment: Restoration of lake mendota and its watershed". Long term  
554 dynamics of lakes in the landscape. . Oxford Press: Oxford.  
555
- 556 Darling AE, Jospin G, Lowe E, Matsen FAt, Bik HM, Eisen JA (2014). PhyloSift:  
557 phylogenetic analysis of genomes and metagenomes. PeerJ 2: e243.  
558
- 559 Eiler A, Heinrich F, Bertilsson S (2012). Coherent dynamics and association networks among  
560 lake bacterioplankton taxa. The ISME journal 6: 330-342.  
561
- 562 Eiler A, Mondav R, Sinclair L, Fernandez-Vidal L, Scofield DG, Schwientek P *et al* (2016).  
563 Tuning fresh: radiation through rewiring of central metabolism in streamlined bacteria. The  
564 ISME journal 10: 1902-1914.  
565
- 566 Fuhrman JA, Cram JA, Needham DM (2015). Marine microbial community dynamics and  
567 their ecological interpretation. Nat Rev Microbiol 13: 133-146.  
568
- 569 Garcia SL, McMahon KD, Martinez-Garcia M, Srivastava A, Sczyrba A, Stepanauskas R *et*  
570 *al* (2013). Metabolic potential of a single cell belonging to one of the most abundant lineages  
571 in freshwater bacterioplankton. The ISME journal 7: 137-147.  
572
- 573 Ghai R, Mizuno CM, Picazo A, Camacho A, Rodriguez-Valera F (2014). Key roles for  
574 freshwater Actinobacteria revealed by deep metagenomic sequencing. Mol Ecol 23: 6073-  
575 6090.  
576
- 577 Ghylin TW, Garcia SL, Moya F, Oyserman BO, Schwientek P, Forest KT *et al* (2014).  
578 Comparative single-cell genomics reveals potential ecological niches for the freshwater acI  
579 Actinobacteria lineage. The ISME journal 8: 2503-2516.  
580
- 581 Glöckner FO, Zaichikov E, Belkova N, Denissova L, Pernthaler J, Pernthaler A *et al* (2000).  
582 Comparative 16S rRNA Analysis of Lake Bacterioplankton Reveals Globally Distributed  
583 Phylogenetic Clusters Including an Abundant Group of Actinobacteria. Appl Environ Microb  
584 66: 5053-5065.  
585
- 586 Hanage WP, Fraser C, Spratt BG (2005). Fuzzy species among recombinogenic bacteria.  
587 BMC Biol 3.  
588
- 589 Heinrich F, Eiler A, Bertilsson S (2013). Seasonality and environmental control of freshwater  
590 SAR11 (LD12) in a temperate lake (Lake Erken, Sweden). Aquatic Microbial Ecology 70:  
591 33-44.  
592
- 593 Henson MW, Lanclos VC, Thrash JC (unpublished data). Insights on the importance of  
594 salinity from the first cultured freshwater SAR11 (LD12) representative. Preprint Archive  
595 BioRxiv. <http://dx.doi.org/10.1101/093567>.  
596
- 597 Hug LA, Baker BJ, Anantharaman K, Brown CT, Probst AJ, Castelle CJ *et al* (2016). A new  
598 view of the tree of life. Nat Microbiol 1: 16048.  
599

- 600 Hunt DE, David LA, Gevers D, Preheim SP, Alm EJ, Polz MF (2008). Resource partitioning  
601 and sympatric differentiation among closely related bacterioplankton. *Science* 320: 1081-  
602 1085.
- 603
- 604 Kaerberlein T, Lewis K, Epstein SS (2002). Isolating "Uncultivable" Microorganisms in Pure  
605 Culture in a Simulated Natural Environment. *Science* 296: 1127-1129.
- 606
- 607 Kang I, Kim S, Islam MR, Cho JC (2017). The first complete genome sequences of the acI  
608 lineage, the most abundant freshwater Actinobacteria, obtained by whole-genome-  
609 amplification of dilution-to-extinction cultures. *Sci Rep* 7: 42252.
- 610
- 611 Kara EL, Hanson PC, Hu YH, Winslow L, McMahon KD (2013). A decade of seasonal  
612 dynamics and co-occurrences within freshwater bacterioplankton communities from  
613 eutrophic Lake Mendota, WI, USA. *ISME Journal* 7: 680-684.
- 614
- 615 Kashtan N, Roggensack SE, Rodrigue S, Thompson JW, Biller SJ, Coe A *et al* (2014).  
616 Single-Cell Genomics Reveals Hundreds of Coexisting Subpopulations in Wild  
617 Prochlorococcus. *Science* 344: 416-420.
- 618
- 619 Kearse M, Moir R, Wilson A, Stones-Havas S, Cheung M, Sturrock S *et al* (2012). Geneious  
620 Basic: An integrated and extendable desktop software platform for the organization and  
621 analysis of sequence data. *Bioinformatics* 28: 1647-1649.
- 622
- 623 Konstantinidis KT, Tiedje JM (2005). Genomic insights that advance the species definition  
624 for prokaryotes. *P Natl Acad Sci USA* 102: 2567-2572.
- 625
- 626 Konstantinidis KT, DeLong EF (2008). Genomic patterns of recombination, clonal  
627 divergence and environment in marine microbial populations. *The ISME journal* 2: 1052-  
628 1065.
- 629
- 630 Little AEF, Robinson CJ, Peterson SB, Raffa KE, Handelsman J (2008). Rules of  
631 Engagement: Interspecies Interactions that Regulate Microbial Communities. *Annu Rev*  
632 *Microbiol* 62: 375-401.
- 633
- 634 Logares R, Brate J, Heinrich F, Shalchian-Tabrizi K, Bertilsson S (2010). Infrequent  
635 Transitions between Saline and Fresh Waters in One of the Most Abundant Microbial  
636 Lineages (SAR11). *Mol Biol Evol* 27: 347-357.
- 637
- 638 Luo CW, Walk ST, Gordon DM, Feldgarden M, Tiedje JM, Konstantinidis KT (2011).  
639 Genome sequencing of environmental *Escherichia coli* expands understanding of the ecology  
640 and speciation of the model bacterial species. *P Natl Acad Sci USA* 108: 7200-7205.
- 641
- 642 Magoc T, Salzberg SL (2011). FLASH: fast length adjustment of short reads to improve  
643 genome assemblies. *Bioinformatics* 27: 2957-2963.
- 644
- 645 Martinez-Garcia M, Swan BK, Poulton NJ, Gomez ML, Masland D, Sieracki ME *et al*  
646 (2011). High-throughput single-cell sequencing identifies photoheterotrophs and  
647 chemoautotrophs in freshwater bacterioplankton. *The ISME journal* 6: 113-123.
- 648



- 649 Newton RJ, Jones SE, Helmus MR, McMahon KD (2007). Phylogenetic Ecology of the  
650 Freshwater Actinobacteria acI Lineage. *Appl Environ Microbiol* 73: 7169-7176.  
651
- 652 Newton RJ, Jones SE, Eiler A, McMahon KD, Bertilsson S (2011). A Guide to the Natural  
653 History of Freshwater Lake Bacteria. *Microbiol Mol Biol Rev* 75: 14-49.  
654
- 655 Oh S, Caro-Quintero A, Tsementzi D, DeLeon-Rodriguez N, Luo CW, Poretsky R *et al*  
656 (2011). Metagenomic Insights into the Evolution, Function, and Complexity of the  
657 Planktonic Microbial Community of Lake Lanier, a Temperate Freshwater Ecosystem. *Appl*  
658 *Environ Microb* 77: 6000-6011.  
659
- 660 Parks DH, Imelfort M, Skennerton CT, Hugenholtz P, Tyson GW (2015). CheckM: assessing  
661 the quality of microbial genomes recovered from isolates, single cells, and metagenomes.  
662 *Genome Res* 25: 1043-1055.  
663
- 664 R Core Team (2014). R: A language and environment for statistical computing., R  
665 Foundation for Statistical Computing, Vienna, Austria. edn.  
666
- 667 Rinke C, Schwientek P, Sczyrba A, Ivanova NN, Anderson IJ, Cheng JF *et al* (2013).  
668 Insights into the phylogeny and coding potential of microbial dark matter. *Nature* 499: 431-  
669 437.  
670
- 671 Rösel S, Allgaier M, Grossart H-P (2012). Long-Term Characterization of Free-Living and  
672 Particle-Associated Bacterial Communities in Lake Tiefwaren Reveals Distinct Seasonal  
673 Patterns. *Microb Ecol* 64: 571-583.  
674
- 675 Salcher MM, Pernthaler J, Posch T (2010). Spatiotemporal distribution and activity patterns  
676 of bacteria from three phylogenetic groups in an oligomesotrophic lake. *Limno*  
677 *Oceanography* 55: 846-856; 846.  
678
- 679 Salcher MM, Pernthaler J, Posch T (2011). Seasonal bloom dynamics and ecophysiology of  
680 the freshwater sister clade of SAR11 bacteria 'that rule the waves' (LD12). *ISME J* 5: 1242-  
681 1252.  
682
- 683 Salcher MM, Posch T, Pernthaler J (2013). In situ substrate preferences of abundant  
684 bacterioplankton populations in a prealpine freshwater lake. *The ISME journal* 7: 896-907.  
685
- 686 Segata N, Bornigen D, Morgan XC, Huttenhower C (2013). PhyloPhlAn is a new method for  
687 improved phylogenetic and taxonomic placement of microbes. *Nature communications* 4:  
688 2304.  
689
- 690 Shade A, Kent AD, Jones SE, Newton RJ, Triplett EW, McMahon KD (2007). Interannual  
691 Dynamics and Phenology of Bacterial Communities in a Eutrophic Lake. *Limnology and*  
692 *Oceanography* 52: 487-494.  
693
- 694 Shapiro BJ, Polz MF (2014). Ordering microbial diversity into ecologically and genetically  
695 cohesive units. *Trends Microbiol* 22: 235-247.  
696
- 697 Stepanauskas R (2012). Single cell genomics: an individual look at microbes. *Curr Opin*  
698 *Microbiol* 15: 613-620.



699  
700 Varghese NJ, Mukherjee S, Ivanova N, Konstantinidis KT, Mavrommatis K, Kyrpides NC *et*  
701 *al* (2015). Microbial species delineation using whole genome sequences. *Nucleic Acids*  
702 *Research* 43: 6761-6771.  
703  
704 Warnecke F, Sommaruga R, Sekar R, Hofer JS, Pernthaler J (2005). Abundances, Identity,  
705 and Growth State of Actinobacteria in Mountain Lakes of Different UV Transparency. *Appl*  
706 *Environ Microbiol* 71: 5551-5559.  
707  
708 Zaremba-Niedzwiedzka K, Viklund J, Zhao WZ, Ast J, Sczyrba A, Woyke T *et al* (2013).  
709 Single-cell genomics reveal low recombination frequencies in freshwater bacteria of the  
710 SAR11 clade. *Genome Biol* 14: R130.  
711  
712 Zwart G, Crump BC, Agterveld MPK-v, Hagen F, Han S-K (2002). Typical freshwater  
713 bacteria: an analysis of available 16S rRNA gene sequences from plankton of lakes and  
714 rivers. *Aquatic Microbial Ecology* 28: 141-155.  
715  
716  
717  
718

## 719 **Acknowledgements**

720 We thank Dr. Todd Miller and Sara Yeo for collecting the original water samples used  
721 to retrieve single cells from Lake Mendota and Sparkling Lake. We thank the Joint Genome  
722 Institute for supporting this work through the Community Science Program, performing the  
723 bioinformatics, and providing technical support. We thank Moritz Buck for informatics and  
724 statistical support. The work conducted by the U.S. Department of Energy Joint Genome  
725 Institute, a DOE Office of Science User Facility, is supported by the Office of Science of the  
726 U.S. Department of Energy under Contract No. DE-AC02-05CH11231. This research was  
727 performed using the compute resources and assistance of the UW-Madison Center for High  
728 Throughput Computing (CHTC) in the Department of Computer Sciences. The CHTC is  
729 supported by UW-Madison, the Advanced Computing Initiative, the Wisconsin Alumni  
730 Research Foundation, the Wisconsin Institutes for Discovery, and the National Science  
731 Foundation, and is an active member of the Open Science Grid, which is supported by the  
732 National Science Foundation and the U.S. Department of Energy's Office of Science. KDM  
733 acknowledges funding from the United States National Science Foundation (NSF) Microbial  
734 Observatories program (MCB-0702395), the Long Term Ecological Research program (NTL-  
735 LTER DEB-0822700), an INSPIRE award (DEB-1344254), and the Swedish Wenner-Gren  
736 Foundation. RS acknowledges funding from NSF (DEB-0841933, EF-0633142 and OCE-  
737 821374). SB acknowledges funding from the Swedish Research Council. Sarahi Garcia  
738 thanks and acknowledges the JSMC for funding. MMG acknowledges funding from Ministry  
739 of Economy and Competitiveness (CGL2013-405064-R and SAF2013-49267-EXP)

740

## 741 **Author contribution**

742 SLG, SLRS, RM, SB and KDM conceived the research. RM, MMG, TW and SGT  
743 conducted experiments and generated the data. SLG, SLRS and KDM analyzed the data.

744 SLG, SLRS and BC prepared the figures. SLG, SLRS, RM, SB and KDM wrote the  
745 manuscript. All authors participated in revision of the manuscript.

746

### 747 **Additional Information**

748           The raw shotgun metagenome reads and SAGs are publicly available in the JGI  
749 Genome Portal and via IMG/MER. The access number for each SAG and metagenome can  
750 be found in **Table 1** and **Table S4**.

751

752

753

754 **Figure and table legends**

755

756

757 **Figure 1.** A. Phylogenetic tree of acI SAGs based on conserved single copy genes selected by  
758 PhyloPhlAn. Amino acid sequences from 400 genes were aligned. The tree topology is  
759 consistent with 16S rRNA gene-based phylogenies (Ghylin et al 2014). SAGs L06 and A23  
760 are part of the same sequence discrete population (SDP) as defined in the text and further  
761 based on data shown in Figure 2. B. Phylogenetic tree of LD12 SAGs based on conserved  
762 single copy genes selected by PhyloPhlAn, representing 400 genes. The tree topology was  
763 consistent with prior work that provided evidence for finer-scale groups within the LD12  
764 tribe (Zaremba-Niedzwiedzka et al 2013). C. Genome-wide nucleotide identity (gANI)  
765 versus 16S rRNA gene identity for pairs of SAGs. Alignment fractions for homologous  
766 genomic regions and 16S rRNA genes are given in **Table S2**. Shapes indicate the lake the  
767 tribe is from, if same, otherwise different lake is indicated. Colors indicate the tribe a pair is  
768 from, if same, otherwise different tribe is indicated. The arrow denotes the L06-A23 pair.

769

770 **Figure 2.** Nucleotide identity density plots for SAG versus SAG genome-wide comparison  
771 using a sliding window. Results are shown for two reference SAGs representing the most  
772 complete genomes from the most thoroughly sampled tribes. All SAG pairs were from the  
773 same tribe. Nucleotide identity was calculated with blastn using 301 bp fragments that  
774 overlapped by 150 bp. A. acI-B1 SAGs and other selected acI SAGs vs L06. Note that the  
775 purple line (D18) is hidden underneath the orange (I18) and red (J17) lines. B. selected LD12  
776 SAGs vs C06. Note the dark blue line (L09) is hidden under the light green (N17) line. Group  
777 designations match those shown in **Figure 1B**, as proposed previously (Zaremba-  
778 Niedzwiedzka et al 2013). An expanded multi-panel version of the same data is shown in  
779 **Figure S1**, for clarity.

780

781 **Figure 3.** Mapping metagenomic reads from Lake Mendota to SAGs and four genomes from  
782 Lake Soyang (Kang et al 2017). The x-axis represents nucleotide identity of the recruited  
783 reads. The metagenome sample was collected from Lake Mendota on 29 April 2009. Reads  
784 were only counted if they aligned over a minimum of 200 bp. Recruitments were not  
785 competitive, meaning that each read could recruit to multiple SAGs. Analogous competitive  
786 recruitments that required each read to recruit to only one SAG are presented in **Figure S4**.  
787 The noncompetitive recruitment showed the close relationship of the LD12 populations that  
788 is not visible in the competitive recruitment. An expanded multi-panel version of the same  
789 data is presented in **Figure S3** for clarity. Each panel represents a different sub-set of the  
790 SAGs: A. acI from Mendota, B. acI not from Mendota, C. LD12 from Mendota (group  
791 members demarcated in legend), D. LD12 not from Mendota (group members demarcated in  
792 legend), E. other freshwater groups from Mendota, F. genomes from Lake Soyang, Korea.  
793 Regarding the other freshwater groups from Mendota, since each of these SAGs represent  
794 just one tribe, it is not appropriate to infer any general conclusions for these populations or  
795 tribes, but we present them here to show the intriguing diversity of recruitment patterns. We  
796 finally underscore the need to more deeply sample individual population members using  
797 SAGs, to better capture and describe the range of variation in population heterogeneity.

798

799

800 **Figure 4.** Sequence-discrete population abundance in Lake Mendota over time, as measured  
801 by the relative number of reads recruited to each SAG using blastn. All SAGs and samples  
802 are from Lake Mendota. Timepoints are pooled by month. Filtering criteria:  $\geq 97.5\%$  ANI and  
803  $\geq 200$  bp alignment length. Recruitment was done using the most strict definition of  
804 competitive described in the methods, meaning any read that matched equally well to more

805 than one SAG was not counted at all. Colors for each SAG are the same as in Figures 2 and  
806 3. Relative abundance was calculated by normalizing the number of basepairs that recruited  
807 to each SAG by dividing by the genome size and the pooled metagenome size. The  
808 normalized number was then multiplied by the average pooled metagenome size. A. Relative  
809 abundance for each acI-B1 SAG. B. Relative abundance for each LD12 SAG. Membership in  
810 the groups defined in Figure 1B and by (Zaremba-Niedzwiedzka et al 2013) are denoted in  
811 the legend.

812

813

814 **Figure 5.** A. Metagenomic read recruitment using the SAGs from Lake Mendota. SAGs are  
815 in rows with bubbles representing all metagenomes from a particular month recruited against  
816 SAG. Filtering criteria:  $\geq 97.5\%$  ANI and  $\geq 200$  bp alignment length. Color scale indicates the  
817 ANI of the recruited metagenome reads. Bubble size represents the average coverage per  
818 base in the reference SAG divided by the size of the metagenome, multiplied by the average  
819 size of all metagenomes (1.34 Gigabases). Grey bubbles indicate that fewer than 200 reads  
820 recruited to the SAG in that month. Note that the resulting values do not represent a true  
821 measure of absolute abundance, but allow for quantitative comparison of month-to-month  
822 variation in population-level abundance. Recruitments were performed competitively,  
823 meaning that each read was counted for only one SAG, unless the read hit two SAGs equally  
824 well in which case it was counted for both SAGs. B. Variation in ANI for each SAG, across  
825 all 30 metagenomes from throughout the five years. Variation was not calculated for a SAG  
826 unless at least ten months recruited more than 200 hits each. The data underlying these plots  
827 can be found in Table S6.

828

829

830 **Tables**

831

832 Table 1. Metadata for the 33 SAGs and genomes from (Kang et al 2017). The Genome OID

833 is the object identifier for the genome record in the Joint Genome Institute's IMG/MER

834 Database. Estimated Genome Completeness was calculated using CheckM as described in the

835 main text and (Parks et al 2015).

836

Table 1

| Genome name | Genome OID in IMG/MER | Phylum/Class        | Tribe       | Lake         | Collection date (M/D/Y) | Assembly size (Mb) | Est. Genome Comp. (checkm) | Number of contigs | GC content (%) | Citation                          |
|-------------|-----------------------|---------------------|-------------|--------------|-------------------------|--------------------|----------------------------|-------------------|----------------|-----------------------------------|
| AAA278-O22  | 2236661007            | Actinobacteria      | acl-A1      | Damariscotta | 09/18/09                | 1.14               | 74.4                       | 43                | 47.6           | Ghylin et al (2014)               |
| AAA027-M14  | 2236661003            | Actinobacteria      | acl-A1      | Mendota      | 12/5/09                 | 0.82               | 43.1                       | 22                | 47.3           | Ghylin et al (2014)               |
| IMCC25003   | 2602042019            | Actinobacteria      | acl-A1      | Soyang       | Jun-13                  | 1.35               | NA                         | 1                 | 49.1           | Kang et al (2017)                 |
| IMCC26103   | 2602042020            | Actinobacteria      | acl-A4      | Soyang       | Apr-14                  | 1.46               | NA                         | 1                 | 47.0           | Kang et al (2017)                 |
| AAA028-I14  | 2619618809            | Actinobacteria      | acl-A6      | Mendota      | 12/5/09                 | 0.78               | 39.66                      | 54                | 45.2           | This paper                        |
| AAA044-N04  | 2236661005            | Actinobacteria      | acl-A7      | Damariscotta | 04/28/09                | 1.29               | 79.59                      | 23                | 45.6           | Ghylin et al (2014)               |
| AAA041-L13  | 2519899769            | Actinobacteria      | acl-A7      | Damariscotta | 04/28/09                | 1.38               | 74.14                      | 103               | 44.2           | This paper                        |
| AAA024-D14  | 2264265190            | Actinobacteria      | acl-A7      | Sparkling    | 05/28/09                | 0.78               | 48.4                       | 82                | 45.4           | Ghylin et al (2014)               |
| AAA023-J06  | 2236661001            | Actinobacteria      | acl-A7      | Sparkling    | 05/28/09                | 0.70               | 34.48                      | 98                | 45.1           | Ghylin et al (2014)               |
| IMCC19121   | 2602042021            | Actinobacteria      | acl-A7      | Soyang       | Oct-11                  | 1.51               | NA                         | 1                 | 45.5           | Kang et al (2017)                 |
| AB141-P03   | 2236876028            | Actinobacteria      | acl-B1      | Stechlin     | 05/25/10                | 0.66               | 45.98                      | 66                | 40.8           | Ghylin et al (2014)               |
| AAA278-I18  | 2236661006            | Actinobacteria      | acl-B1      | Damariscotta | 09/18/09                | 0.94               | 63.73                      | 54                | 41.4           | Ghylin et al (2014)               |
| AAA028-A23  | 2236661004            | Actinobacteria      | acl-B1      | Mendota      | 12/5/09                 | 0.83               | 57.56                      | 64                | 41.5           | Ghylin et al (2014)               |
| AAA027-L06  | 2505679121            | Actinobacteria      | acl-B1      | Mendota      | 12/5/09                 | 1.16               | 76.59                      | 75                | 41.7           | Garcia et al (2013)               |
| AAA027-J17  | 2236661002            | Actinobacteria      | acl-B1      | Mendota      | 12/5/09                 | 0.97               | 65.26                      | 81                | 42.1           | Ghylin et al (2014)               |
| AAA023-D18  | 2236661009            | Actinobacteria      | acl-B1      | Sparkling    | 05/28/09                | 0.75               | 44.22                      | 67                | 39.6           | Ghylin et al (2014)               |
| AAA044-D11  | 2619618811            | Actinobacteria      | acl-B4      | Damariscotta | 04/28/09                | 1.15               | 66.18                      | 30                | 44.2           | This paper                        |
| IMCC26077   | 2606217181            | Actinobacteria      | acl-C1      | Soyang       | Apr-14                  | 1.55               | NA                         | 1                 | 51.3           | Kang et al (2017)                 |
| AAA027-D23  | 2524023172            | Actinobacteria      | acSTL-A1    | Mendota      | 12/5/09                 | 0.94               | 44.01                      | 18                | 48.0           | This paper                        |
| AAA028-N15  | 2619618810            | Actinobacteria      | acTH1-A1    | Mendota      | 12/5/09                 | 0.83               | 45.98                      | 19                | 38.0           | This paper                        |
| AAA487-M09  | 2236347068            | Alphaproteobacteria | LD12        | Damariscotta | 09/18/09                | 0.63               | 53.15                      | 97                | 29.1           | Zaremba-Niedzwiedzka et al (2013) |
| AAA280-P20  | 2236876029            | Alphaproteobacteria | LD12        | Damariscotta | 09/18/09                | 0.72               | 65.06                      | 65                | 29.6           | Zaremba-Niedzwiedzka et al (2013) |
| AAA280-B11  | 2236876032            | Alphaproteobacteria | LD12        | Damariscotta | 09/18/09                | 0.67               | 51.24                      | 47                | 29.8           | Zaremba-Niedzwiedzka et al (2013) |
| AAA028-D10  | 2236347069            | Alphaproteobacteria | LD12        | Mendota      | 12/5/09                 | 0.93               | 81.64                      | 57                | 29.6           | Zaremba-Niedzwiedzka et al (2013) |
| AAA028-C07  | 2236661008            | Alphaproteobacteria | LD12        | Mendota      | 12/5/09                 | 0.85               | 74.12                      | 32                | 29.5           | Zaremba-Niedzwiedzka et al (2013) |
| AAA027-L15  | 2236876031            | Alphaproteobacteria | LD12        | Mendota      | 12/5/09                 | 0.72               | 68.68                      | 56                | 29.4           | Zaremba-Niedzwiedzka et al (2013) |
| AAA027-J10  | 2236876030            | Alphaproteobacteria | LD12        | Mendota      | 12/5/09                 | 0.79               | 69.56                      | 82                | 29.8           | Zaremba-Niedzwiedzka et al (2013) |
| AAA027-C06  | 2264265094            | Alphaproteobacteria | LD12        | Mendota      | 12/5/09                 | 0.78               | 82.29                      | 90                | 29.6           | Zaremba-Niedzwiedzka et al (2013) |
| AAA024-N17  | 2236876027            | Alphaproteobacteria | LD12        | Sparkling    | 05/28/09                | 0.33               | 30.19                      | 45                | 30.1           | Zaremba-Niedzwiedzka et al (2013) |
| AAA023-L09  | 2236661000            | Alphaproteobacteria | LD12        | Sparkling    | 05/28/09                | 0.77               | 68.1                       | 76                | 29.4           | Zaremba-Niedzwiedzka et al (2013) |
| AAA027-G08  | 2619618806            | Bacteroidetes       | bacl-A1     | Mendota      | 12/5/09                 | 1.32               | 59.36                      | 36                | 35.5           | This paper                        |
| AAA027-N21  | 2619618807            | Bacteroidetes       | Flavo-A2    | Mendota      | 12/5/09                 | 2.21               | 92.44                      | 36                | 33.1           | This paper                        |
| AAA027-K21  | 2619618803            | Betaproteobacteria  | betIII-A1   | Mendota      | 12/5/09                 | 1.38               | 42.1                       | 21                | 51.5           | This paper                        |
| AAA028-K02  | 2619618804            | Betaproteobacteria  | LD28        | Mendota      | 12/5/09                 | 0.56               | 34.48                      | 8                 | 37.5           | This paper                        |
| AAA027-I06  | 2619618802            | Betaproteobacteria  | Lhab-A1     | Mendota      | 12/5/09                 | 1.52               | 39.38                      | 79                | 50.9           | This paper                        |
| AAA027-C02  | 2619618801            | Betaproteobacteria  | PnecC       | Mendota      | 12/5/09                 | 1.27               | 61.93                      | 49                | 43.7           | This paper                        |
| AAA027-I19  | 2619618805            | Verrucomicrobia     | Opiputaceae | Mendota      | 12/5/09                 | 2.42               | 54.58                      | 63                | 51.7           | This paper                        |

NA = Not applicable



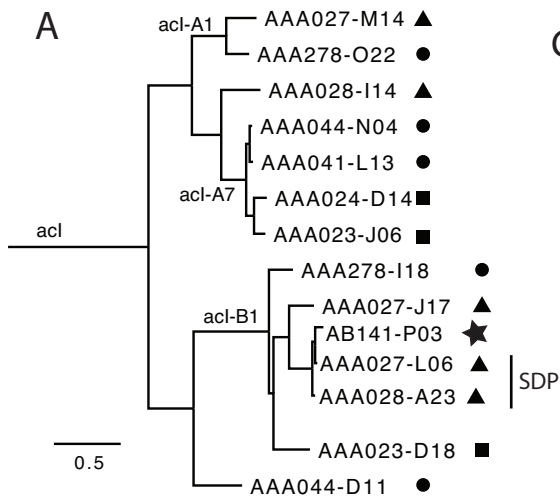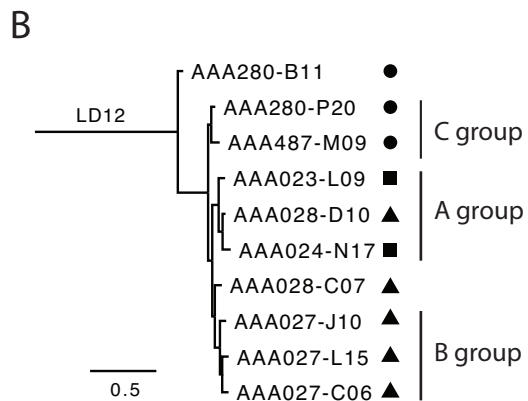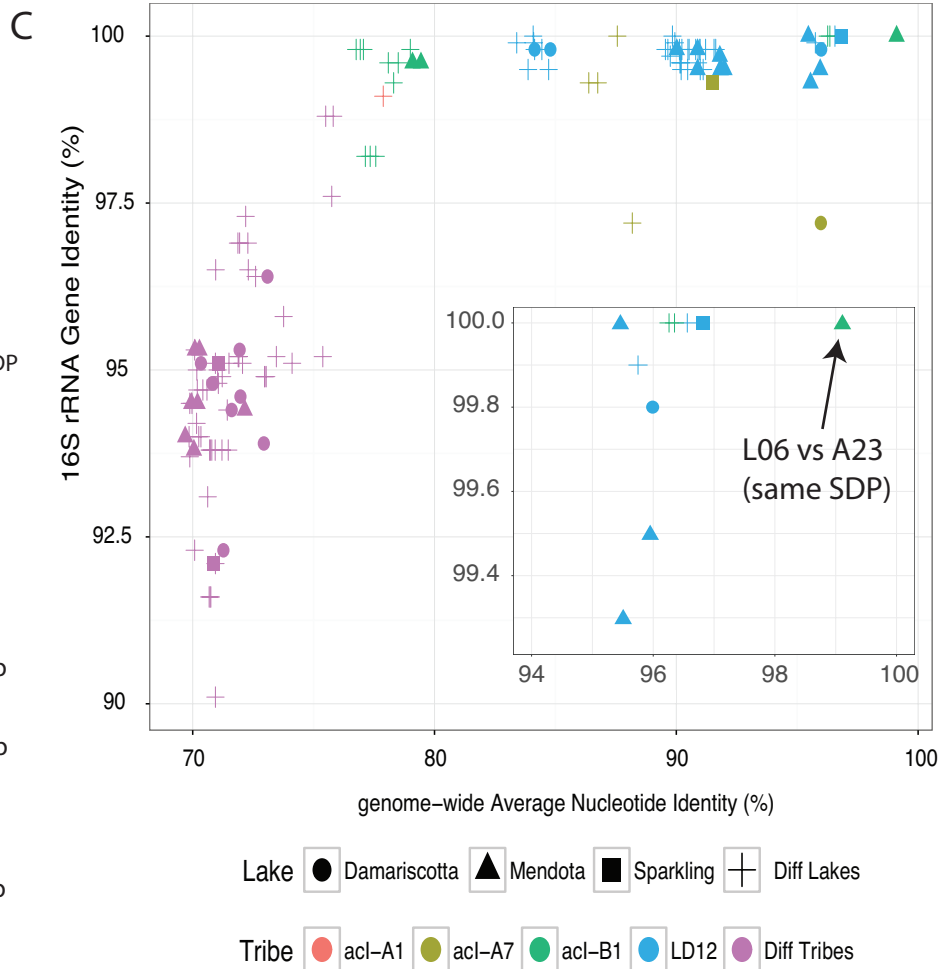

Figure 1

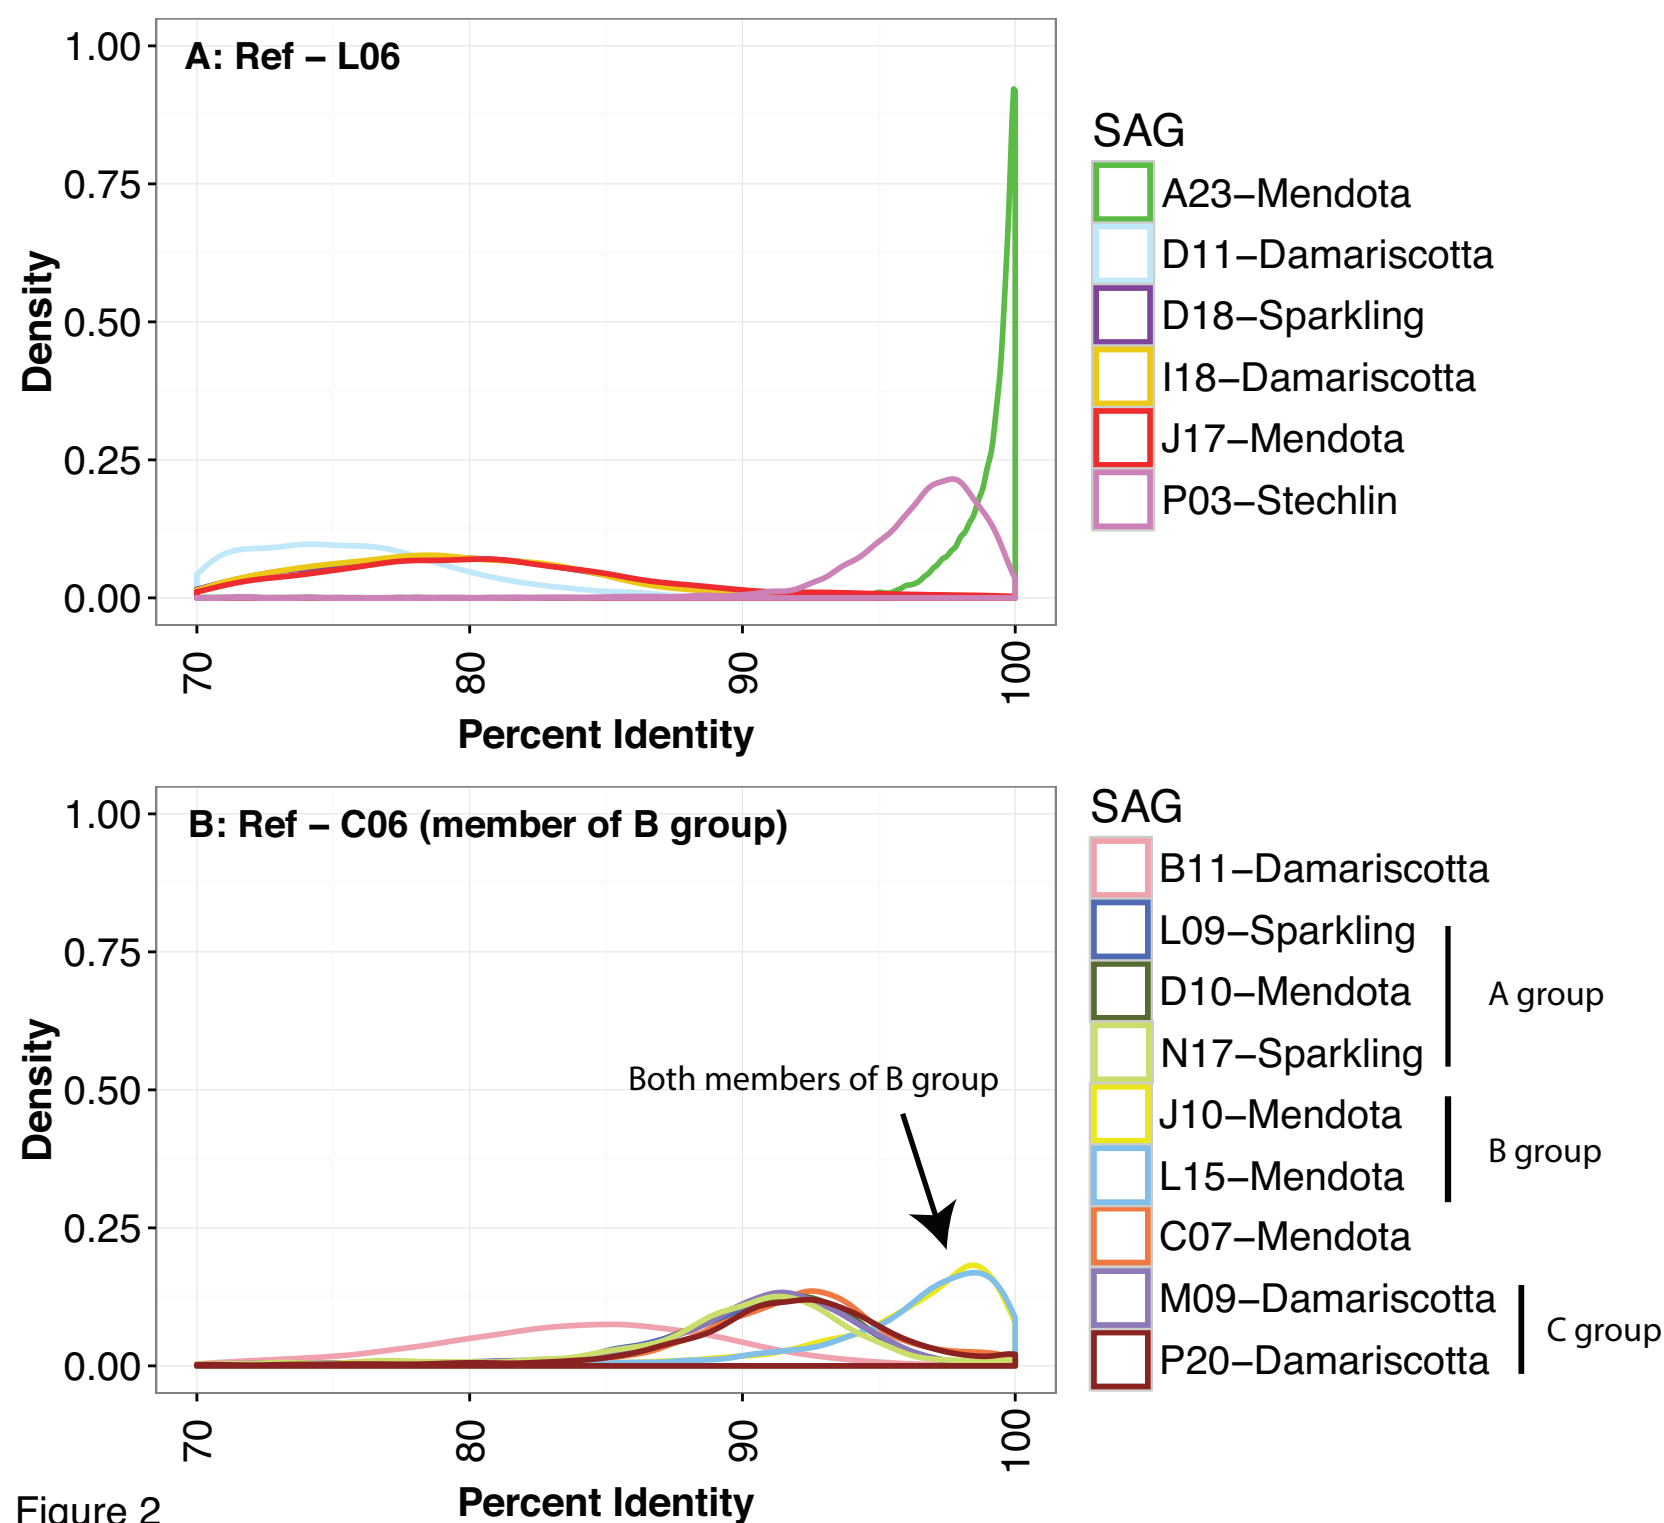

### acl-Mendota

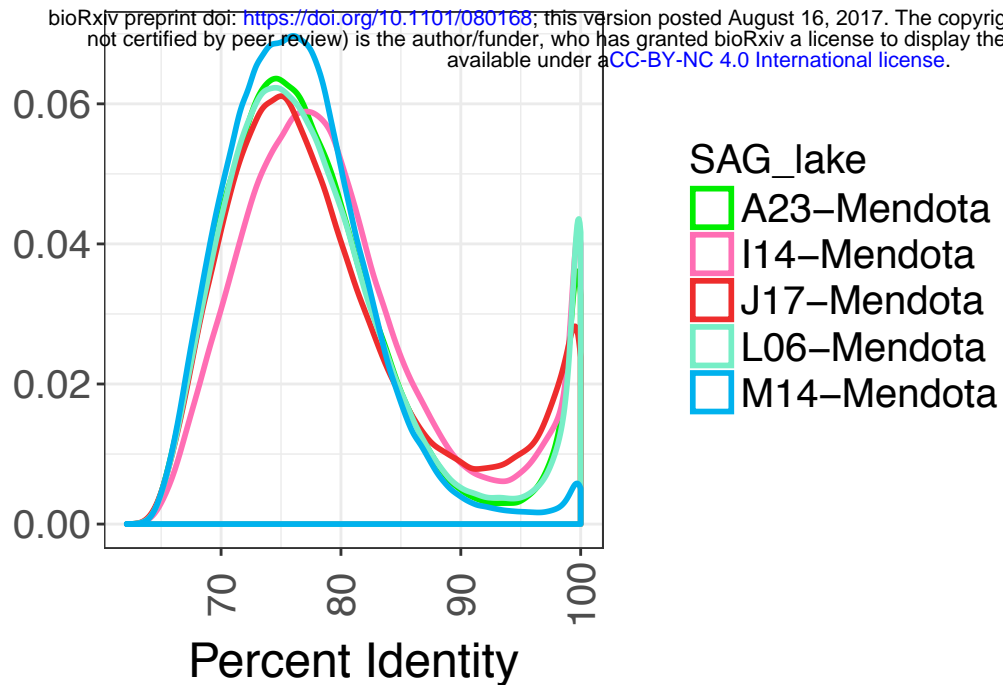

### LD12-Mendota

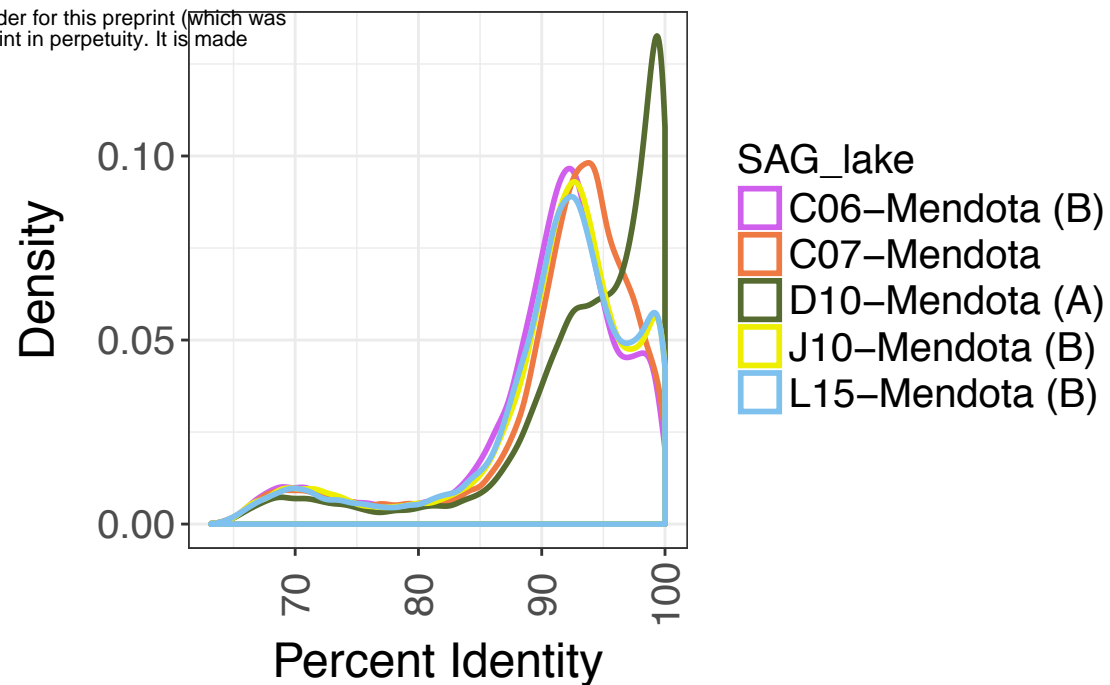

### other-SAGs-Mendota

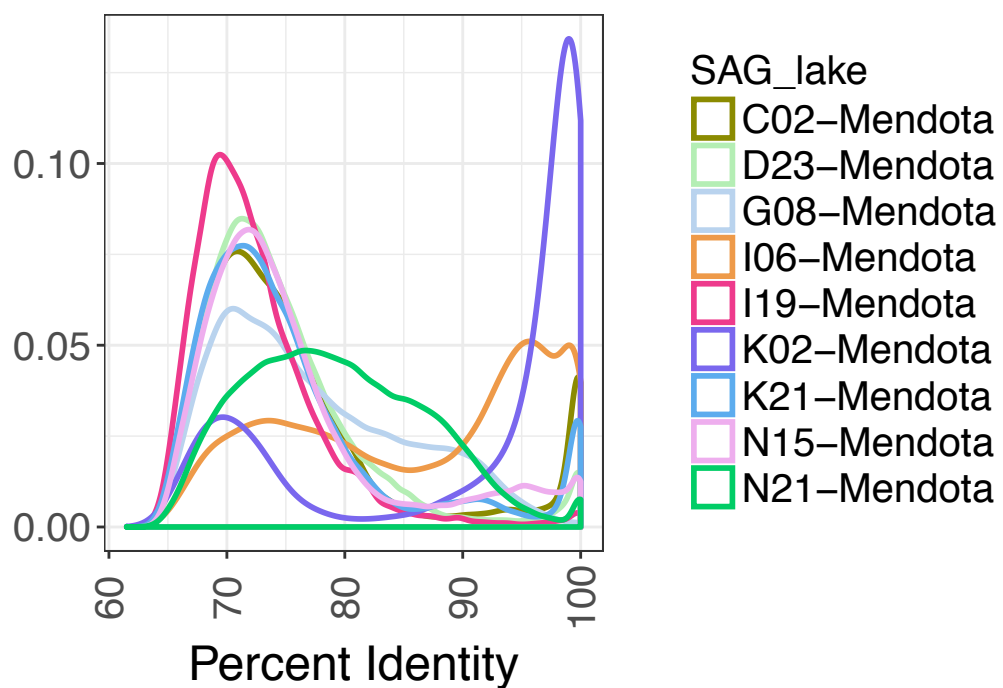

### acl-non-Mendota

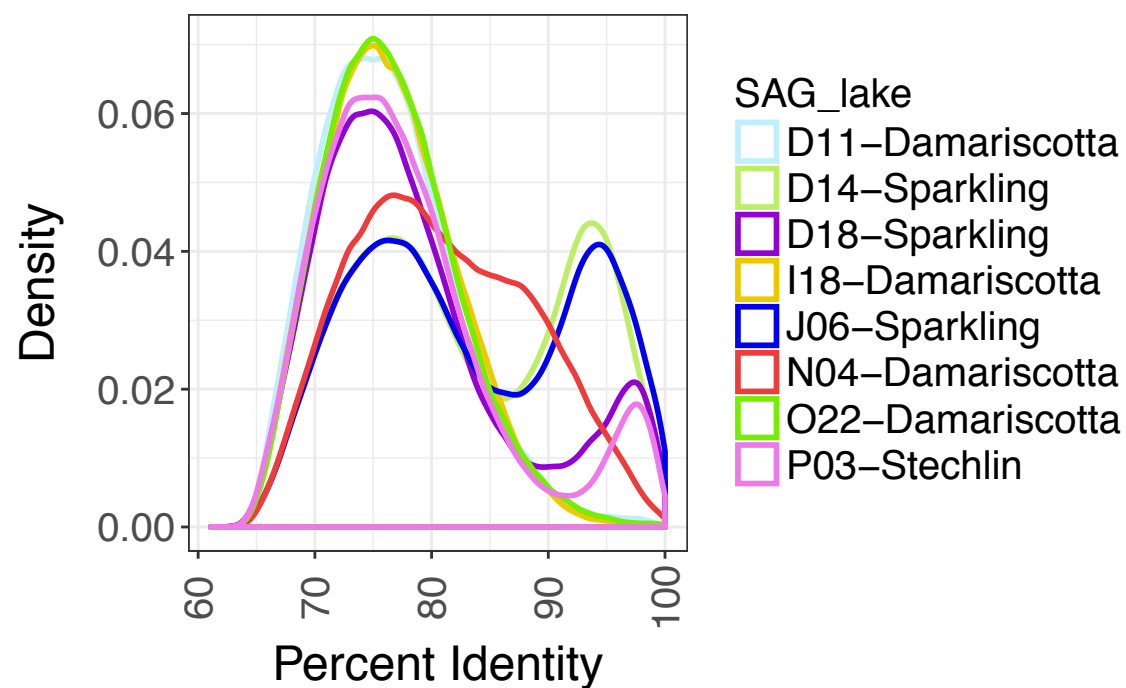

### LD12-non-Mendota

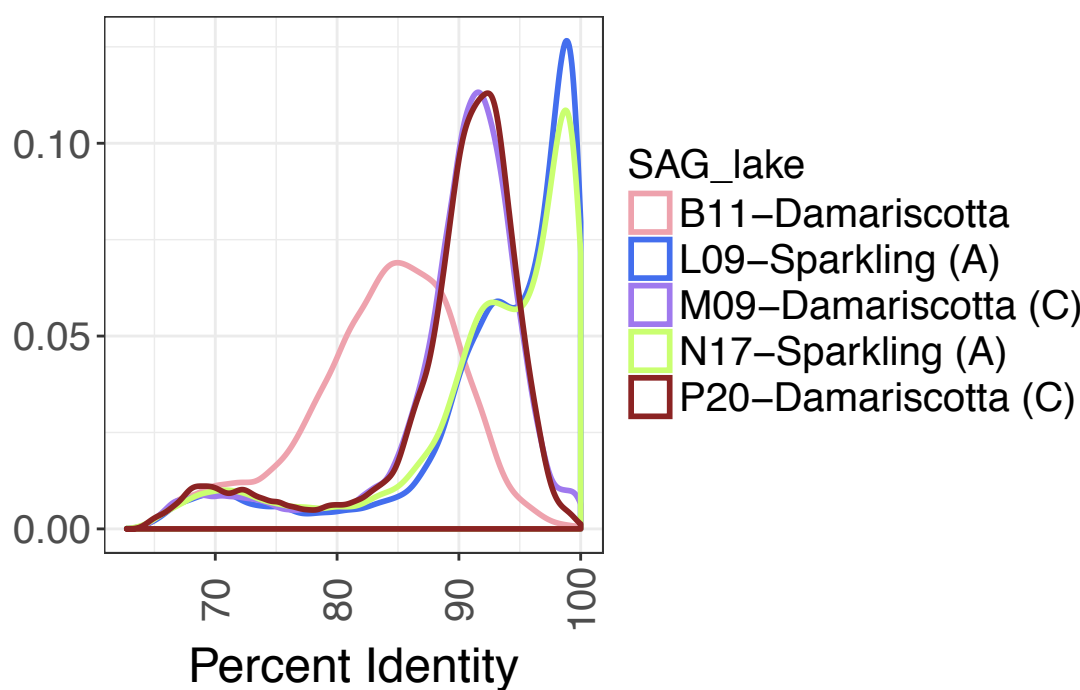

### acl-Soyang

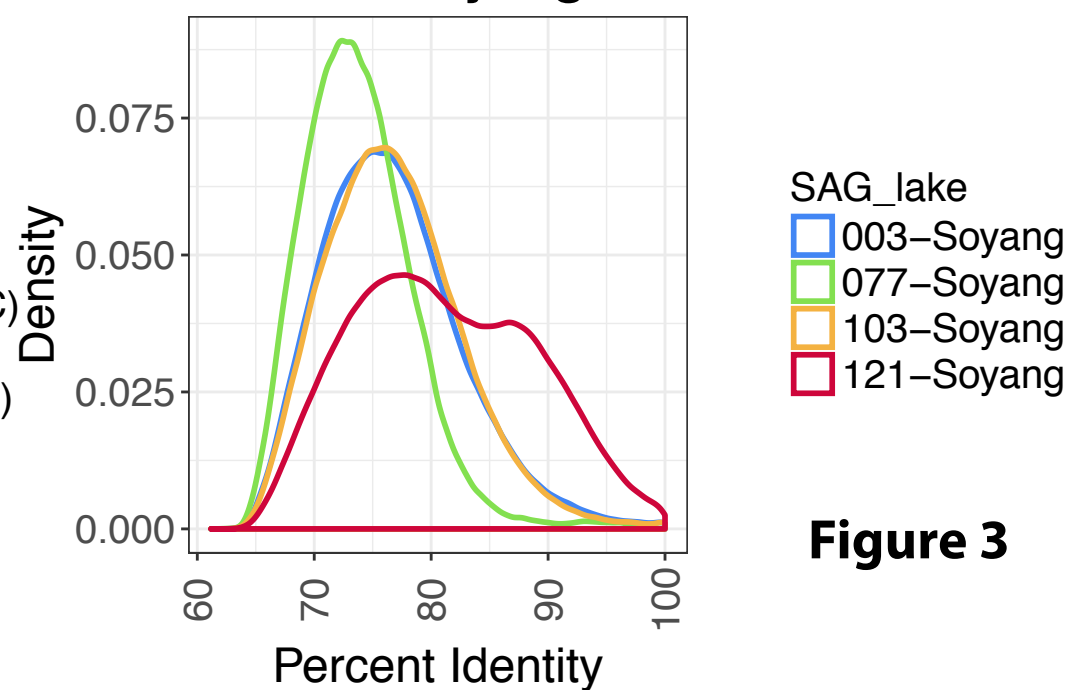

**Figure 3**

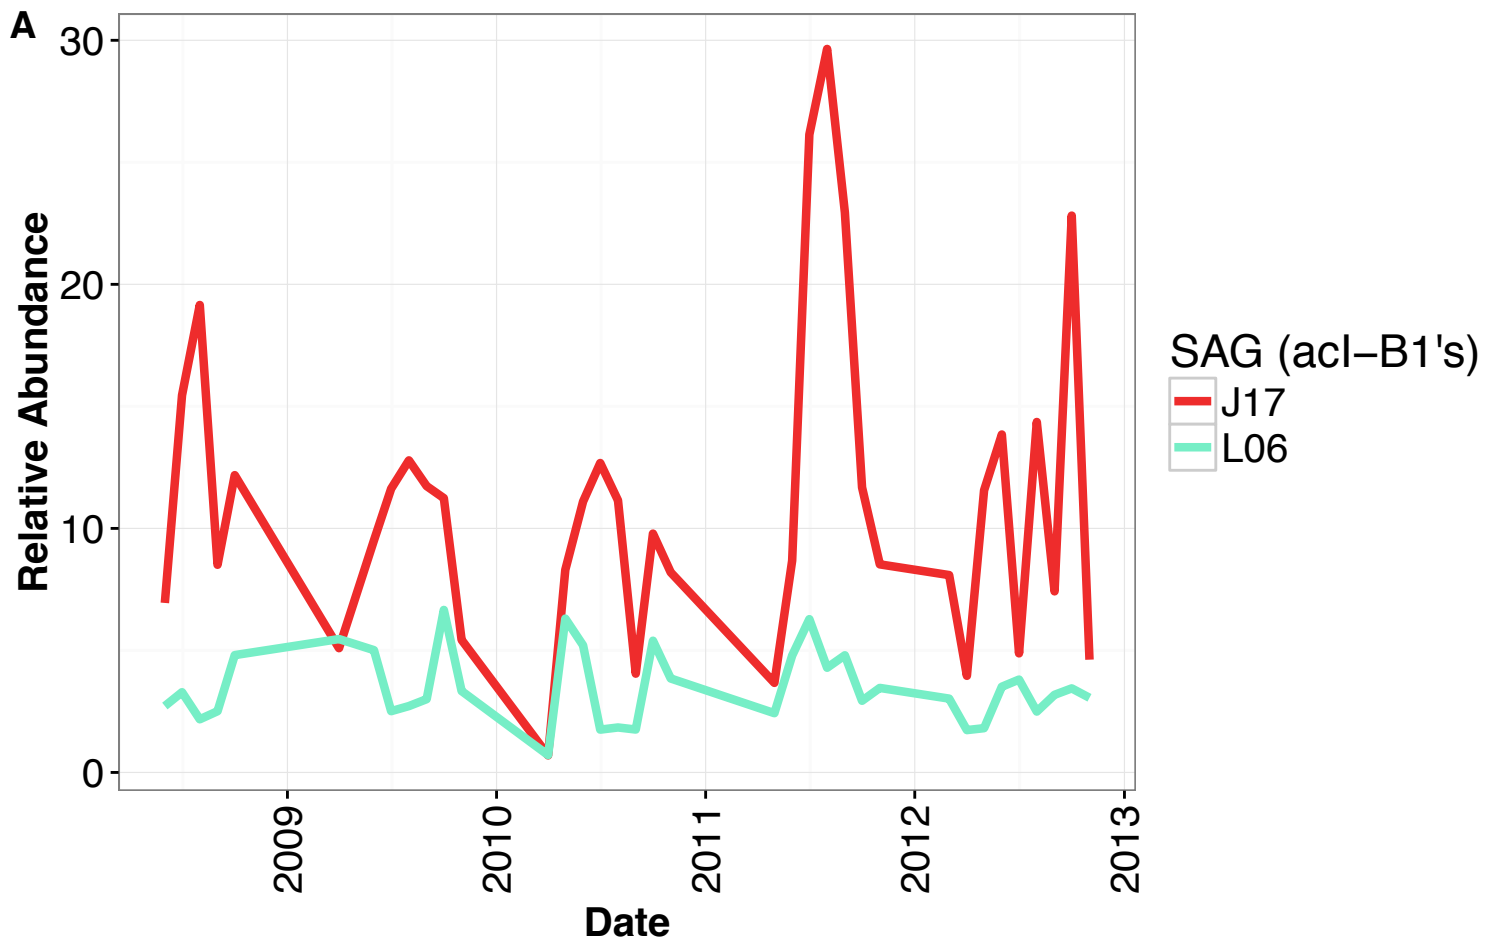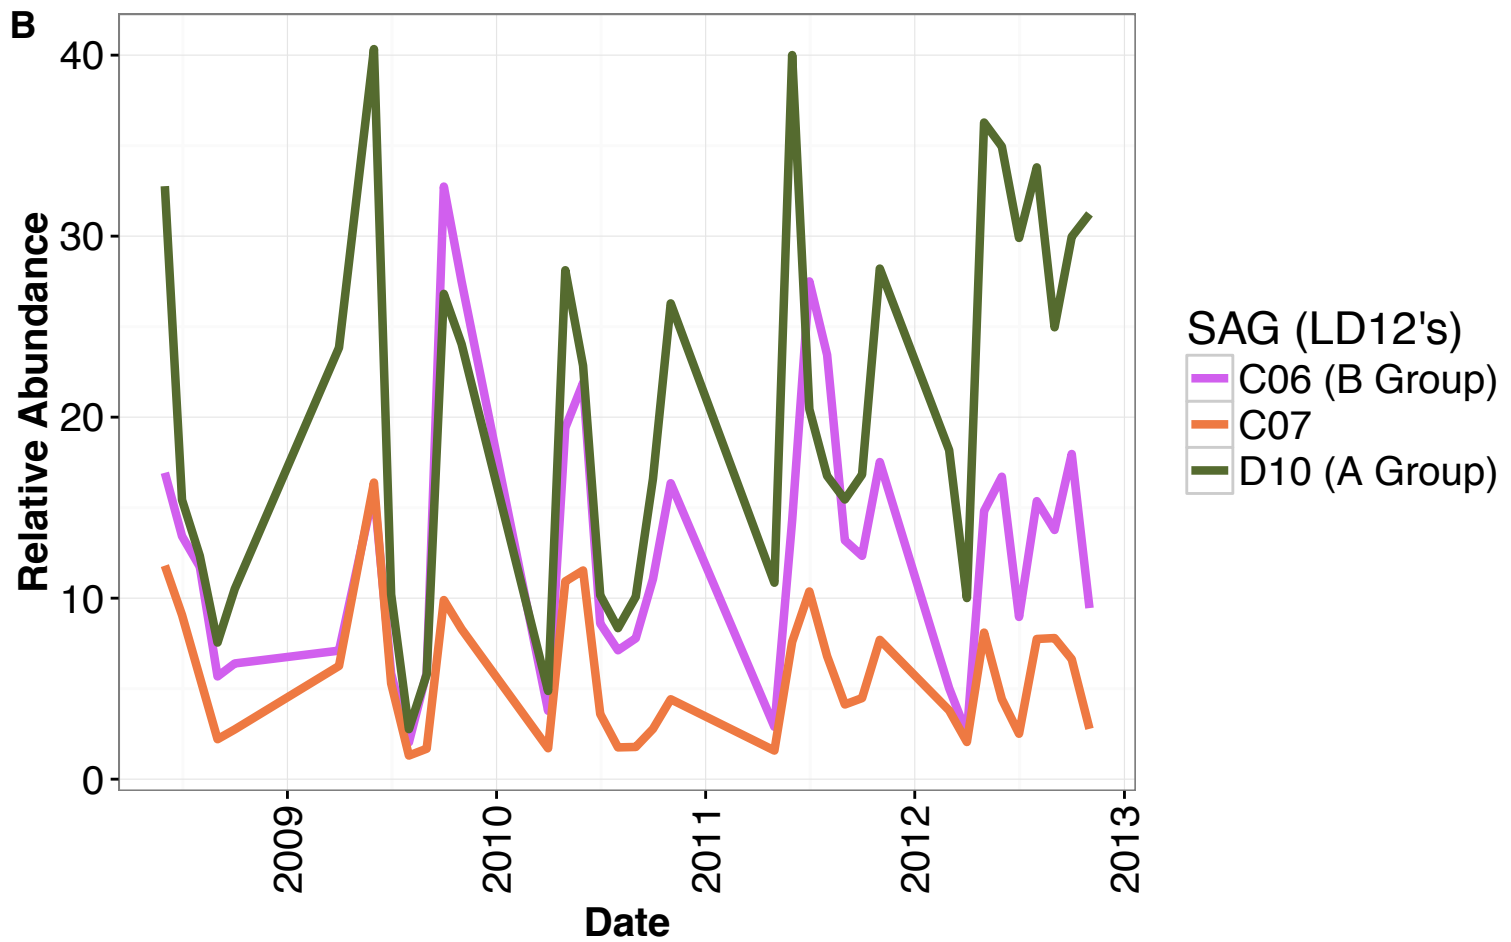

**A**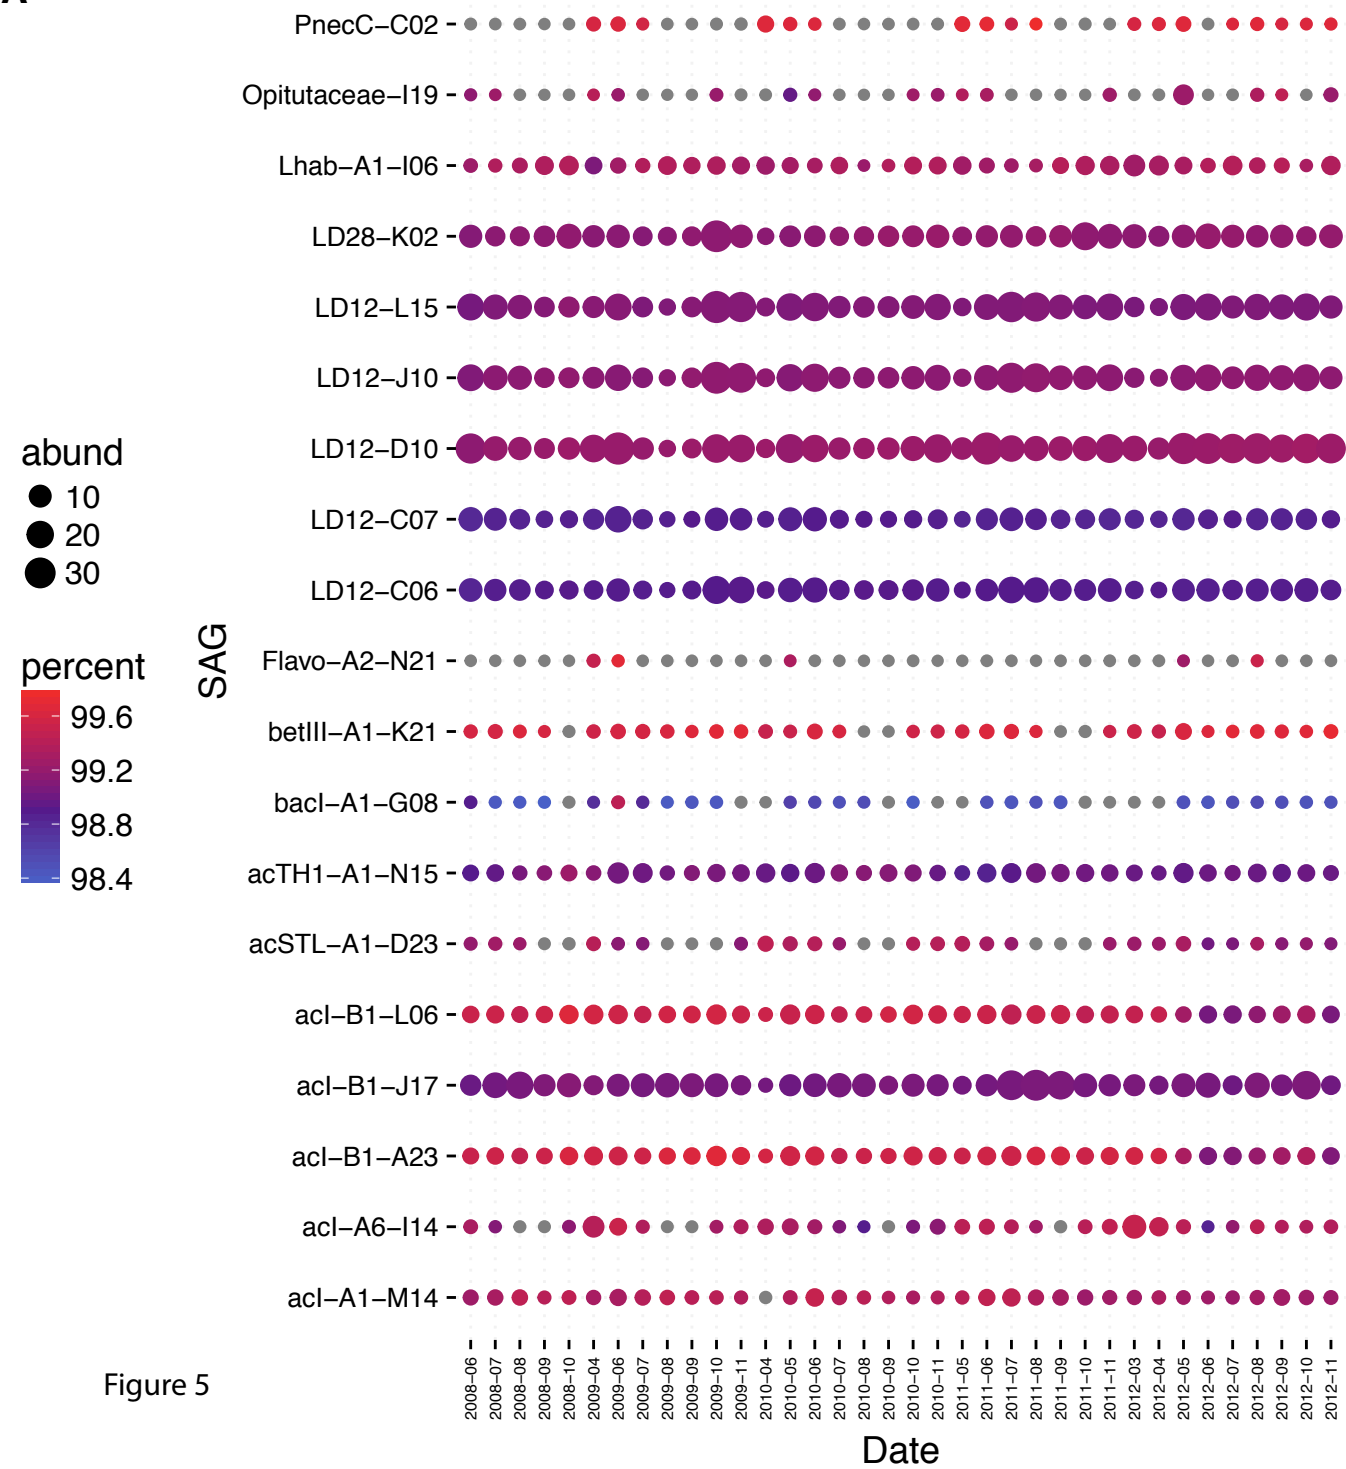**B**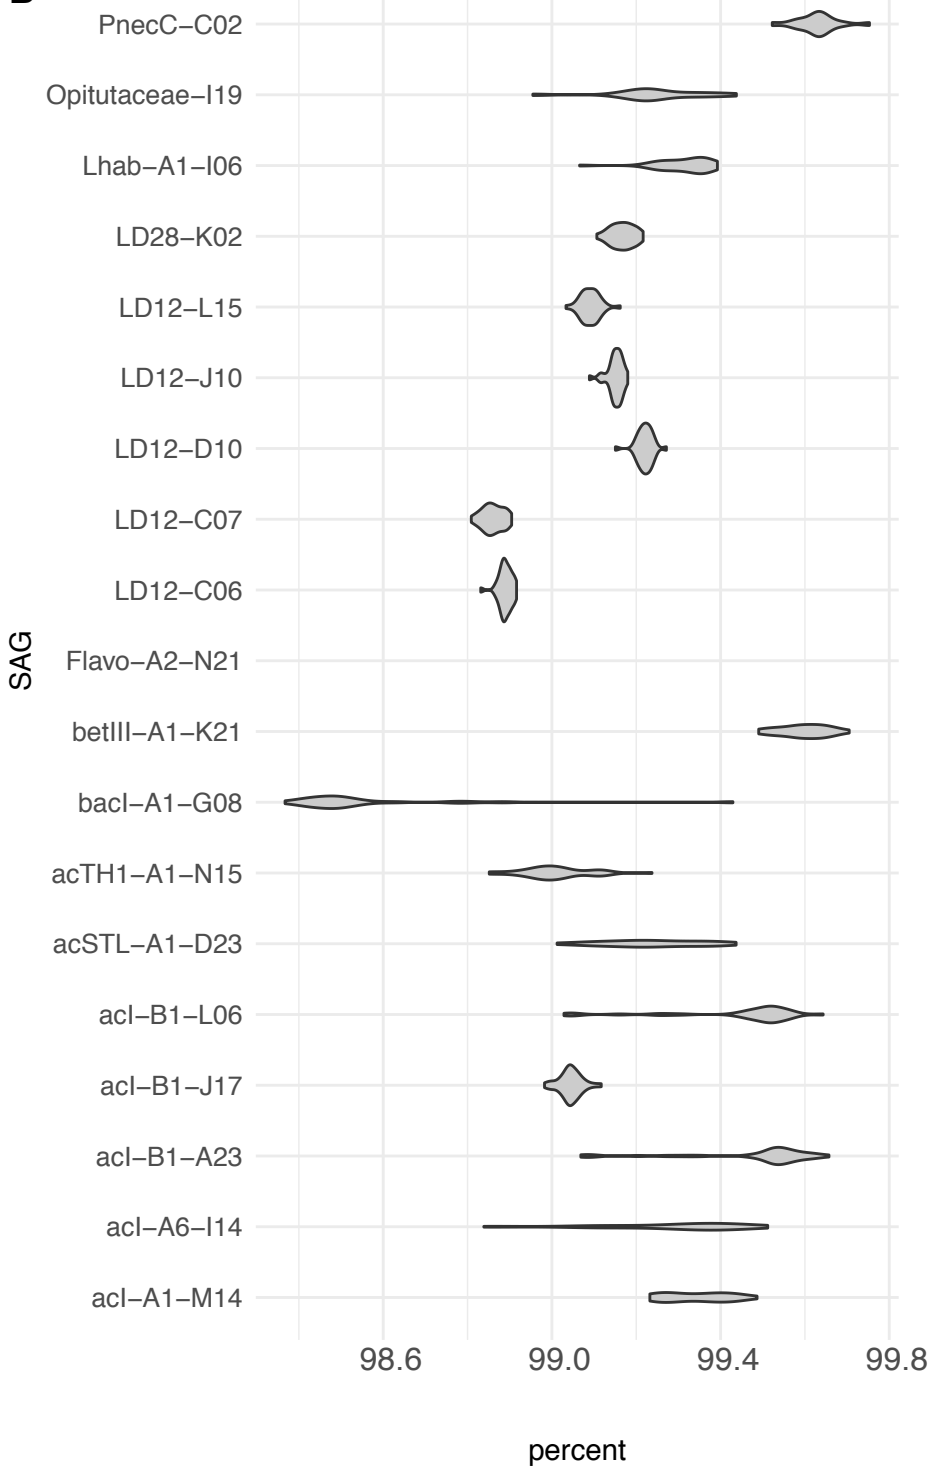

Figure 5
